# Supplementary material for: Calpain cleavage of Junctophilin-2 generates a spectrum of calcium-dependent cleavage products and DNA-rich NT1-fragment domains in cardiomyocytes
Source: PubMed Central journal article supplement (PMC9209451; doi:10.1038/s41598-022-14320-9), 2022-06-20
Supplement: 41598_2022_14320_MOESM4_ESM.pdf [file 41598_2022_14320_MOESM4_ESM.pdf]

## Supplementary Information

| Amino Acid Position | Predicted Cleavage Site | FPR (%) |
|---------------------|-------------------------|---------|
| 52                  | AGVY↓TWPS               | 1.26    |
| 57                  | WPSG↓NTFE               | 1.25    |
| 144                 | YGVR↓QSVP               | 1.34    |
| 145                 | GVRQ↓SVPY               | 0.36    |
| 155                 | AVVV↓RSPL               | 0.77    |
| 156                 | VVVR↓SPLR               | 0.40    |
| 164                 | TSL↓SLRS                | 0.86    |
| 167                 | SSLR↓SEHS               | 0.53    |
| 201                 | ALTL↓LATA               | 1.11    |
| 202                 | LTL↓ATAE                | 0.48    |
| 221                 | TLL↓RLRR                | 1.40    |
| 224                 | GRLR↓RSES               | 1.50    |
| 233                 | TSLG↓SQRS               | 0.46    |
| 243                 | SFLK↓SELS               | 0.21    |
| 247                 | SELS↓SGAS               | 0.42    |
| 257                 | ASTG↓SLAE               | 0.73    |
| 352                 | LPLK↓SSKV               | 0.92    |
| 377                 | ARQK↓AEIA               | 0.87    |
| 391                 | AKAK↓AEAA               | 1.26    |
| 482                 | SPAG↓TPPQ               | 0.33    |
| 500                 | DGLL↓SPGS               | 1.56    |
| 526                 | AGRR↓SPAR               | 1.43    |
| 548                 | PAPS↓QEPE               | 1.36    |
| 562                 | YHSY↓AVRT               | 0.67    |
| 565                 | YAVR↓TGPP               | 0.83    |
| 623                 | ATLE↓PKPI               | 1.90    |
| 646                 | RGLS↓KAGA               | 0.58    |
| 649                 | SKAG↓AKKK               | 0.99    |

**Table S1.** In silico prediction of Calpain cleavages sites in JP2 with DeepCalpain. The sequence of mouse JP2 (Uniprot: Q9ET78) was analyzed by the DeepCalpain tool predicting Calpain-specific cleavage sites. The table represents the top-28 prediction results with false positive rates (FPR) below <1.91%. Arrows indicate where the cleavage events are predicted and corresponding amino acid positions are specifically listed. Red colors indicate experimentally confirmed cleavage events.

| <b>Antibody</b>        | <b>Epitope</b>     | <b>Detected fragments</b>                                                                                   |
|------------------------|--------------------|-------------------------------------------------------------------------------------------------------------|
| JP2 NT<br>(Abcam)      | 66-115<br>(mouse)  | NT <sub>2</sub> , NT <sub>3</sub> , FL (weak), NT <sub>1</sub> (weak)                                       |
| JP2 M<br>(Fitzgerald)  | 408-457<br>(human) | FL, NT <sub>1</sub> , NT <sub>1</sub> -NT <sub>2</sub> (weak), NT <sub>1</sub> -NT <sub>3</sub> (very weak) |
| JP2 CT<br>(Santa Cruz) | 431-680<br>(mouse) | FL, CT <sub>1</sub> , CT <sub>2</sub>                                                                       |

**Table S2.** Epitope regions of different JP2 antibodies. Three different JP2 antibodies were used with affinities to different epitopes in full-length JP2 according to the manufacturers. Additionally, detected JP2 fragments after Calpain digestion are listed and weaker signals indicated.

| <b>Domain / motif</b>              | <b>Mouse</b>           | <b>Human</b>           |
|------------------------------------|------------------------|------------------------|
| FL JP2                             | 1-696                  | 1-696                  |
| MORN1                              | 14-36                  | 14-36                  |
| MORN2                              | 38-59                  | 38-59                  |
| MORN3                              | 60-79                  | 60-79                  |
| MORN4                              | 82-104                 | 82-104                 |
| MORN5                              | 106-128                | 106-128                |
| MORN6                              | 129-151                | 129-151                |
| Joining region                     | 152-284                | 152-290                |
| MORN7                              | 285-307                | 291-313                |
| MORN8                              | 308-330                | 313-336                |
| $\alpha$ -Helical domain           | 351-417                | 357-423                |
| Divergent region                   | 436-664                | 442-664                |
| Transmembrane domain               | 675-695                | 675-695                |
| <b>Nuclear localization signal</b> |                        |                        |
| Bipartite NLS                      | 345-359                | 351-365                |
| Monopartite NLS                    | 488-492                | 495-499                |
| <b>Predicted PEST motifs</b>       |                        |                        |
| PEST1                              | 170-194 (score: 3.36)  | 170-197 (score: 5.37)  |
| PEST2                              | 243-290 (score 7.52)   | 250-296 (score: 6.67)  |
| PEST3                              | 468-488 (score: 16.37) | 479-495 (score: 11.60) |
| PEST4                              | 565-589 (score: 26.85) | 572-610 (score: 17.03) |
| PEST5                              | 590-612 (score: 17.52) |                        |

**Table S3.** Domains and sequence motifs in mouse and human JP2. The domains/motifs and their sequence positions are listed for mouse JP2 (Uniprot: Q9ET78) and human JP2 (Uniprot: Q9BR39) as reported before<sup>10,11</sup>. PEST motifs were predicted in the mouse and human JP2 sequence with the PESTfind algorithm.

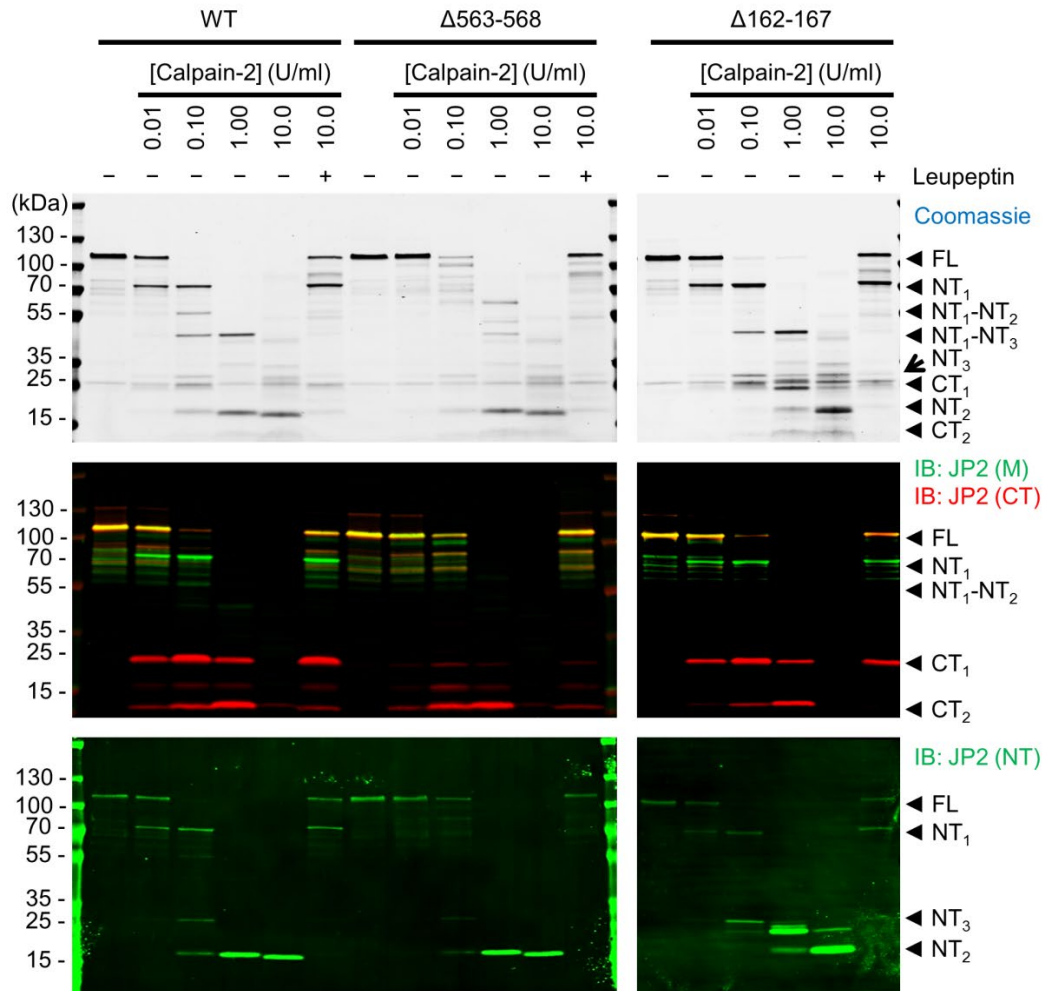

**Figure S1.** Calpain-2 digestion of the cleavage site-specific deletion mutants JP2<sup>Δ563-568</sup> and JP2<sup>Δ162-167</sup>. JP2<sup>WT</sup>, JP2<sup>Δ563-568</sup> or JP2<sup>Δ162-167</sup> were digested with increasing concentrations of Calpain-2 for 30 min at 30°C as indicated. As negative control, 10 μM Leupeptin was added to inhibit Calpain-2 at the highest concentration. Samples were subjected to SDS-PAGE. The cleavage pattern was detected by Coomassie staining (top) and immunoblotting (center & bottom) using JP2 antibodies against the N-terminal (NT), middle (M) and C-terminal region (CT). While the deletion mutation  $\Delta 563-568$  prevents the 1<sup>st</sup> cleavage event,  $\Delta 162-167$  prevents the 2<sup>nd</sup> cleavage event evidenced as loss of the fragments NT<sub>1</sub>-NT<sub>2</sub> and NT<sub>2</sub>. At Calpain concentrations above >0.1 U/ml, the  $\Delta 162-167$  truncated protein shows additional fragments indicating further digestion of NT<sub>3</sub>.

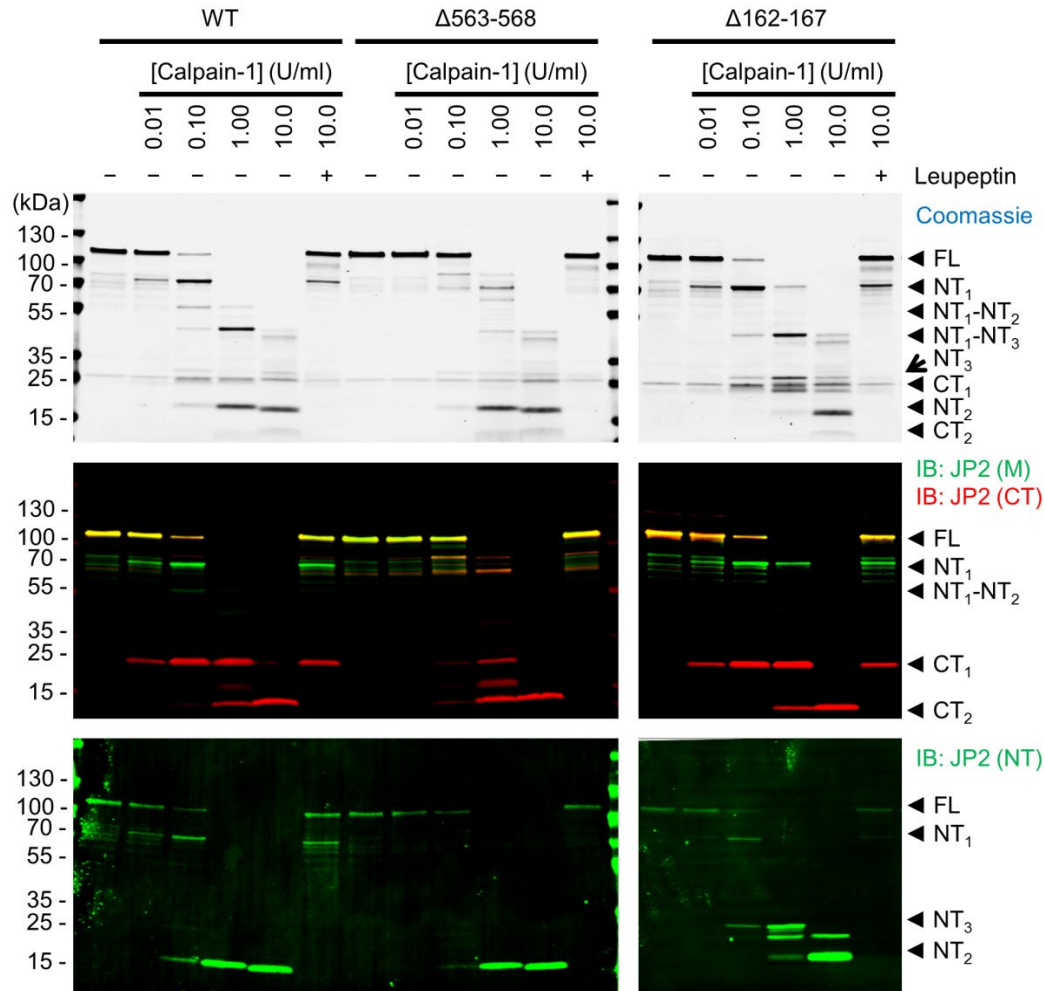

**Figure S2.** Calpain-1 digestion of the cleavage site-specific deletion mutants JP2 $\Delta 563-568$  and JP2 $\Delta 162-167$ . JP2<sup>WT</sup>, JP2 $\Delta 563-568$  or JP2 $\Delta 162-167$  were digested with the indicated concentrations of Calpain-1 for 30 min at 30°C. As negative control, 10  $\mu$ M Leupeptin was added to inhibit Calpain-1 at the highest concentration. Samples were subjected to SDS-PAGE. The cleavage pattern was detected by Coomassie staining (top) and immunoblotting (center & bottom) using JP2 antibodies against the N-terminal (NT), middle (M) and C-terminal region (CT) as indicated. While the deletion mutation  $\Delta 563-568$  prevents the 1<sup>st</sup> cleavage event,  $\Delta 162-167$  prevents the 2<sup>nd</sup> cleavage event resulting in the loss of the fragments NT<sub>1</sub>-NT<sub>2</sub> and NT<sub>2</sub>. At Calpain concentrations above >0.1 U/ml, the  $\Delta 162-167$  truncated protein shows additional fragments indicating further digestion of NT<sub>3</sub>.

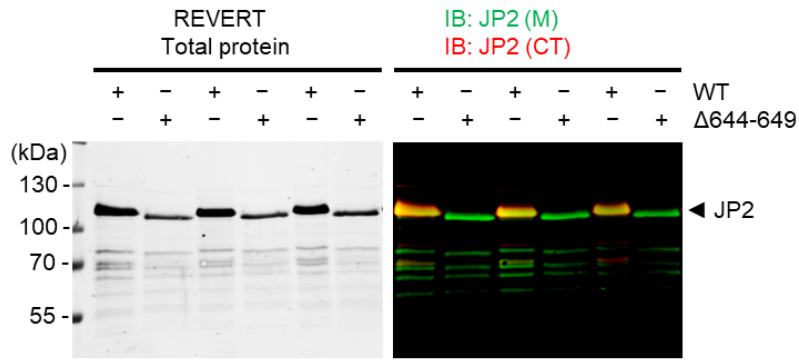

**Figure S3.** The JP2 deletion mutation  $\Delta$ 644-649 diminishes epitope detection by the C-terminal JP2 antibody. Purified JP2<sup>WT</sup> and the deletion mutant JP2 <sup>$\Delta$ 644-649</sup> were subjected to Western blot analysis. The JP2 antibody against the C-terminal region (CT) detects WT JP2 but no longer JP2 <sup>$\Delta$ 644-649</sup>. In contrast, both the JP2 antibody against the middle region (M) and the REVERT total protein stain confirm the presence of both the JP2<sup>WT</sup> and JP2 <sup>$\Delta$ 644-649</sup> proteins. Thus, the JP2 amino acids 644-649 represent an essential region of C-terminal JP2 antibody epitope.

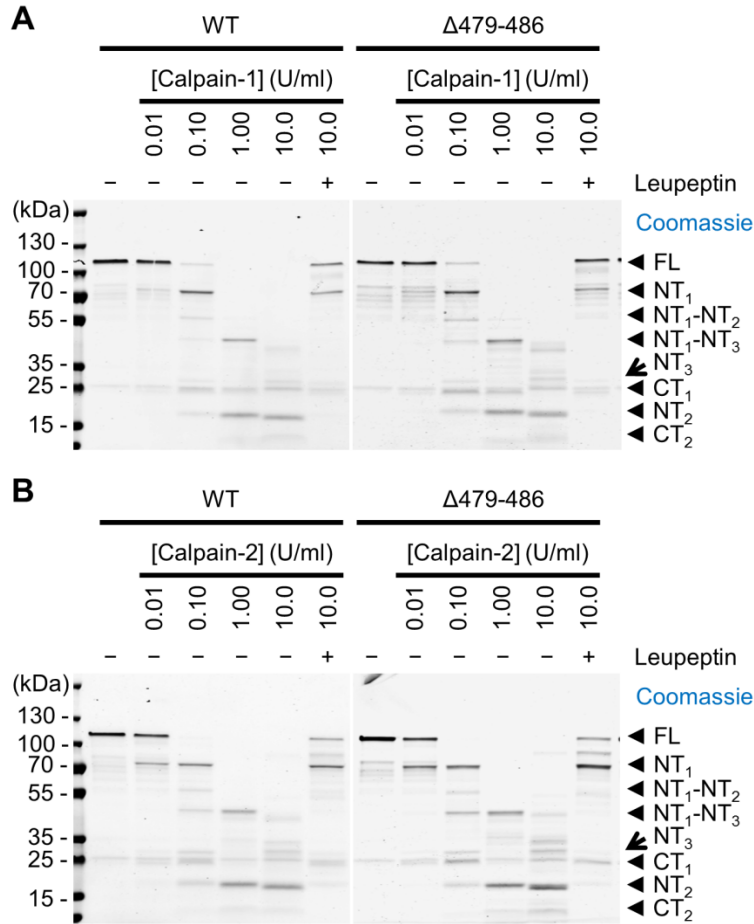

**Figure S4.** The JP2 deletion mutation  $\Delta 479-486$  does not prevent cleavage by Calpain-1 or Calpain-2. JP2<sup>WT</sup> or JP2 <sup>$\Delta 479-486$</sup>  were digested with the indicated concentrations of Calpain-1 (**A**) or Calpain-2 (**B**) for 30 min at 30°C. As negative control, the inhibitor Leupeptin (10  $\mu$ M) was added. Samples were subjected to SDS-PAGE followed by Coomassie staining. In comparison to WT, the deletion mutation  $\Delta 479-486$  does not significantly alter the cleavage pattern following Calpain-1 or Calpain-2 digestion, indicating that G482 does not function as Calpain cleavage site.

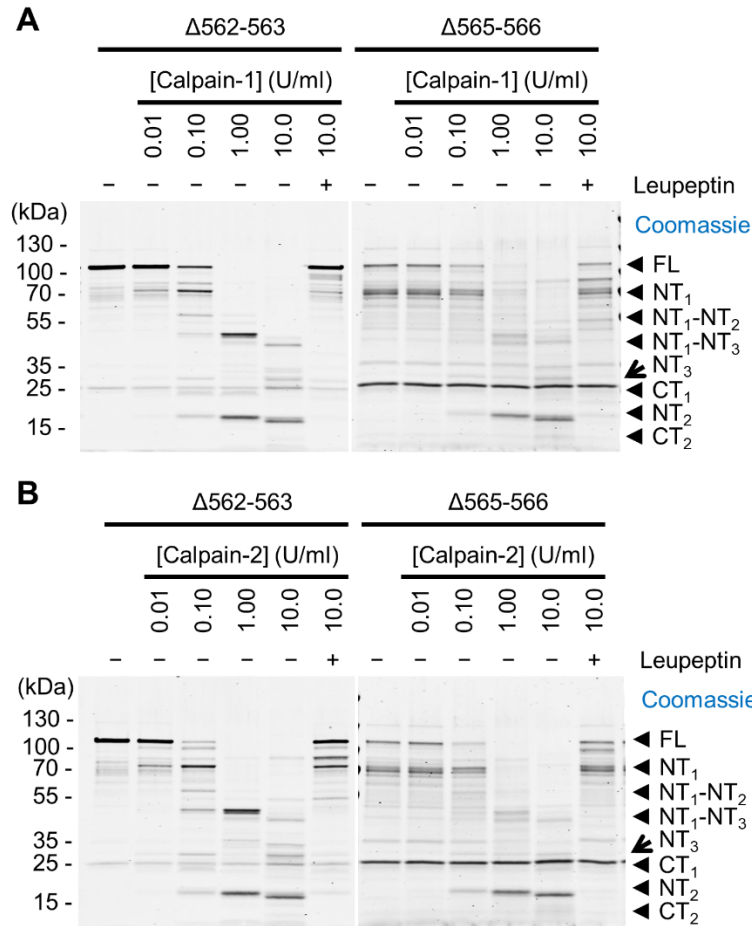

**Figure S5.** The initial Calpain cleavage event is stronger impaired by JP2 $\Delta 565-566$  than by JP2 $\Delta 562-563$ . The in silico predicted (please refer to Table S1 for additional details) cleavage site deletion mutants JP2 $\Delta 562-563$  or JP2 $\Delta 565-566$  were digested with indicated concentrations of Calpain-1 (**A**) or Calpain-2 (**B**) for 30 min at 30°C. As negative control, the inhibitor Leupeptin (10  $\mu$ M) was added. Samples were subjected to SDS-PAGE followed by Coomassie staining. The comparison shows that the initial cleavage event of JP2 by Calpain-1 or Calpain-2 is stronger impaired through the JP2 deletion mutation  $\Delta 565-566$  than  $\Delta 562-563$ , indicating that the scissile bond is rather formed by R565-T566 than by Y562-A563.



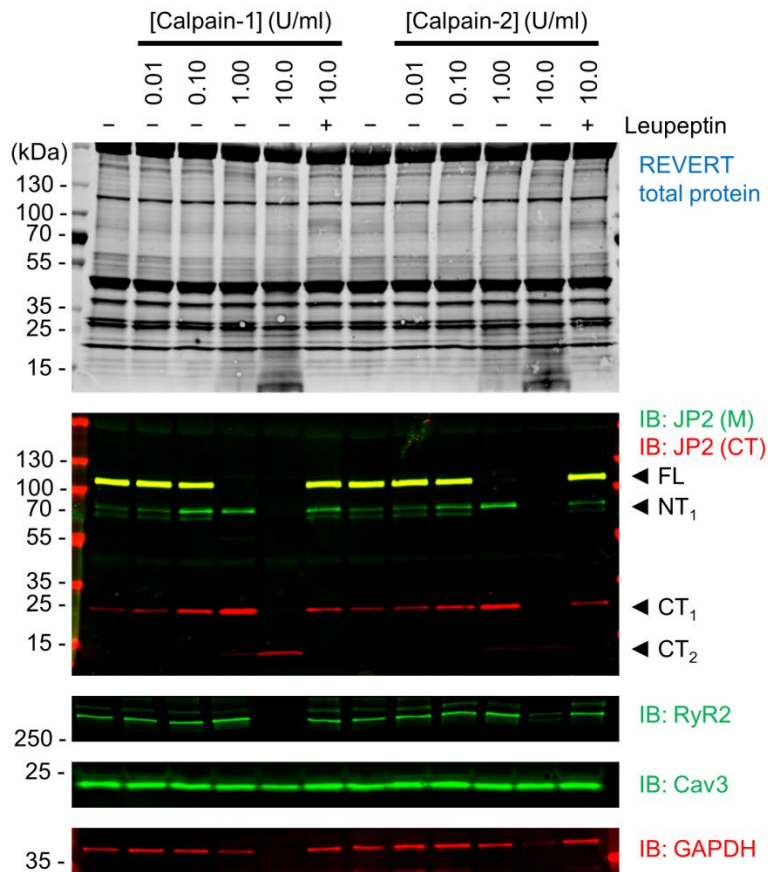

**Figure S6.** Proteolysis of endogenous JP2 in adult ventricular cardiomyocyte lysates by Calpain-1 and Calpain-2. Cell lysates of isolated ventricular C57BL6/N mouse cardiomyocytes were digested with the indicated concentrations of Calpain-1 or Calpain-2 for 30 min at 30°C. Samples were subjected to immunoblotting using antibodies against the middle (M) and C-terminal region (CT) of JP2, RyR2, Cav3, and GAPDH. The total protein was visualized by REVERT staining (top). The REVERT and immunostaining signal bands show that native cardiac JP2 is a substrate specifically susceptible to Calpain-mediated proteolysis compared to RyR2, Cav3 or GAPDH showing no major changes.

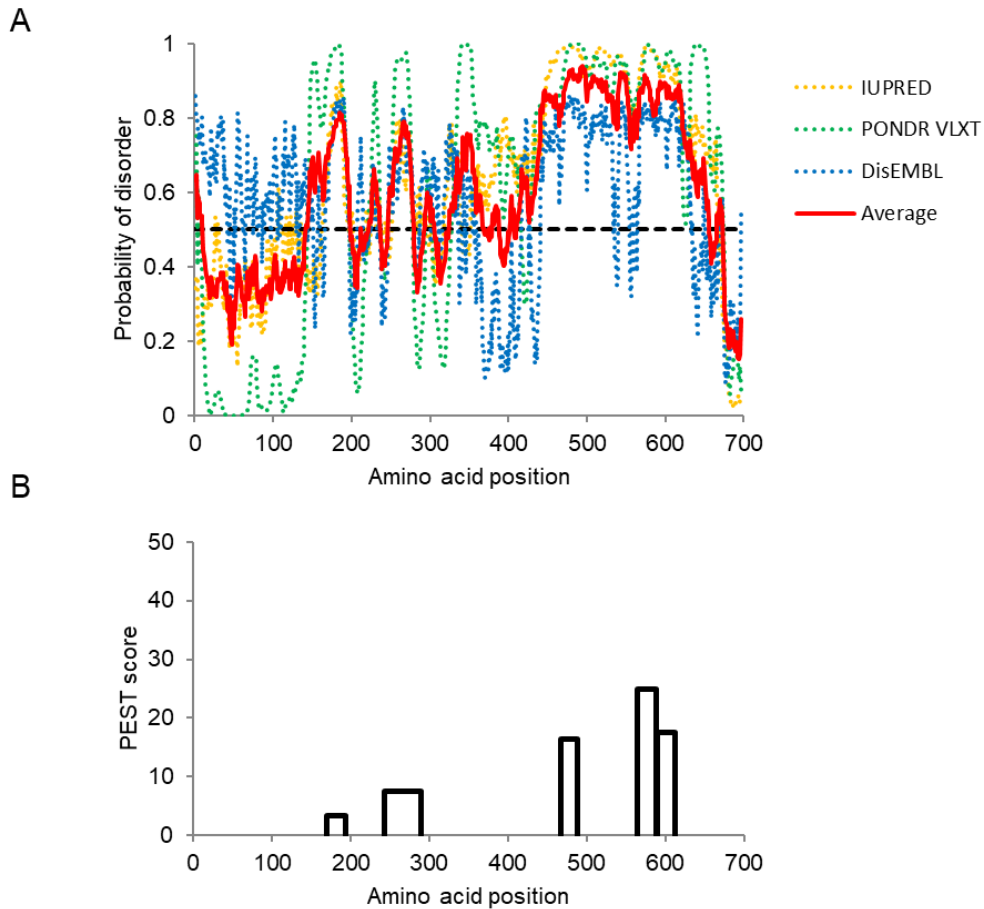

**Figure S7.** In silico prediction of intrinsically disordered regions and PEST motifs in JP2. **(A)** The sequence of mouse JP2 (Uniprot: Q9ET78) was analyzed using IUPRED (orange), PONDR VLXT (green), and DisEMBL (blue) algorithms. The line representing the average (red) clearly predicts the C-terminal JP2 region between amino acid position 450 and 650 as extensively intrinsically disordered region and consistently between all three algorithms. **(B)** Five potential PEST motifs were predicted in the JP2 sequence when analyzed with the PESTfind tool. The Calpain cleavage site at R565 overlaps with the highest scored PEST motif in the C-terminal JP2 region.

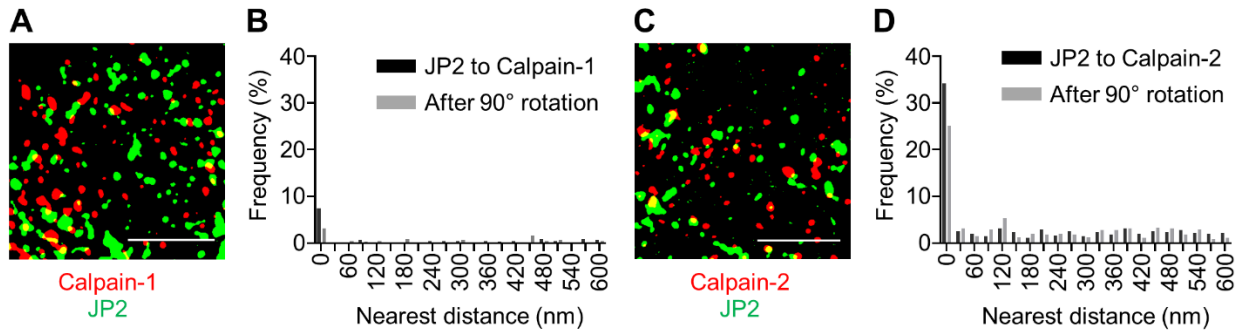

**Figure S8.** JP2 and Calpain-2 clusters are frequently located within nanometric proximity in hiPSC-CMs, whereas JP2 and Calpain clusters are not frequently proximity associated. (A, C) Segmented image confocal immunofluorescence data of hiPSC-CMs stained by JP2 M (green) and Calpain-1 (red) antibodies (A) or JP2 CT (green) and Calpain-2 (red) antibodies (C). Scale bar: 5  $\mu$ m. (B, D) Bar graphs (black) showing the frequency distribution (%) for the indicated nearest distance bins (0 to 600 nm) for JP2 M and Calpain-1 or JP2 CT and Calpain-2, respectively. To exclude random cluster signal proximities from artificial high signal density labeling, grey bars in (B, D) compare the segmented images before and after 90° image rotation, respectively. While the JP2 and Calpain-1 cluster signals were rarely proximal to each other ( $d = 0$  nm), the JP2 and Calpain-2 signals remained frequently in proximity as expected. Finally, we confirmed that JP2/Calpain-2 cluster proximity ( $d = 0$  nm  $\approx$ 35%) in (D) was significantly different after the image rotation (paired t-test,  $p = 0.0002$ ,  $n = 5$  images/hiPSC-CMs).

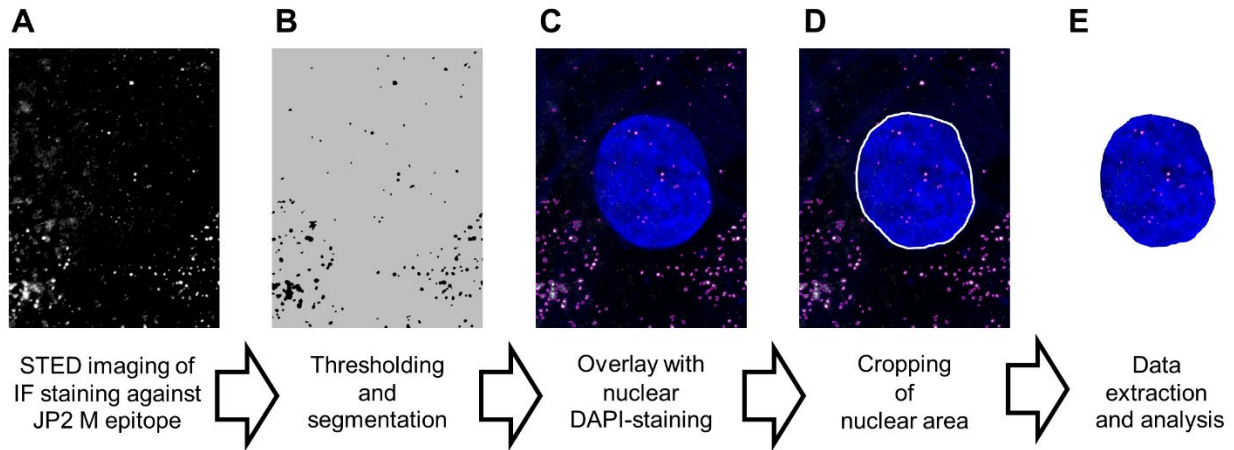

**Figure S9.** Workflow of intranuclear JP2 signal analysis. **(A)** STED image of hiPSC-CMs stained by immunofluorescence using the JP2 M antibody. The initial image preprocessing includes color correction, adjustment of brightness, and conversion into an 8-bit binary image. **(B)** Segmented image after Gaussian blur, background subtraction, and thresholding using the Triangle algorithm. **(C)** Overlay of segmented image with DAPI-staining (blue) and original JP2 staining (white). **(D)** Defining of the nuclear border (white line). **(E)** Determination of nuclear area and number of intranuclear JP2 signal spots.

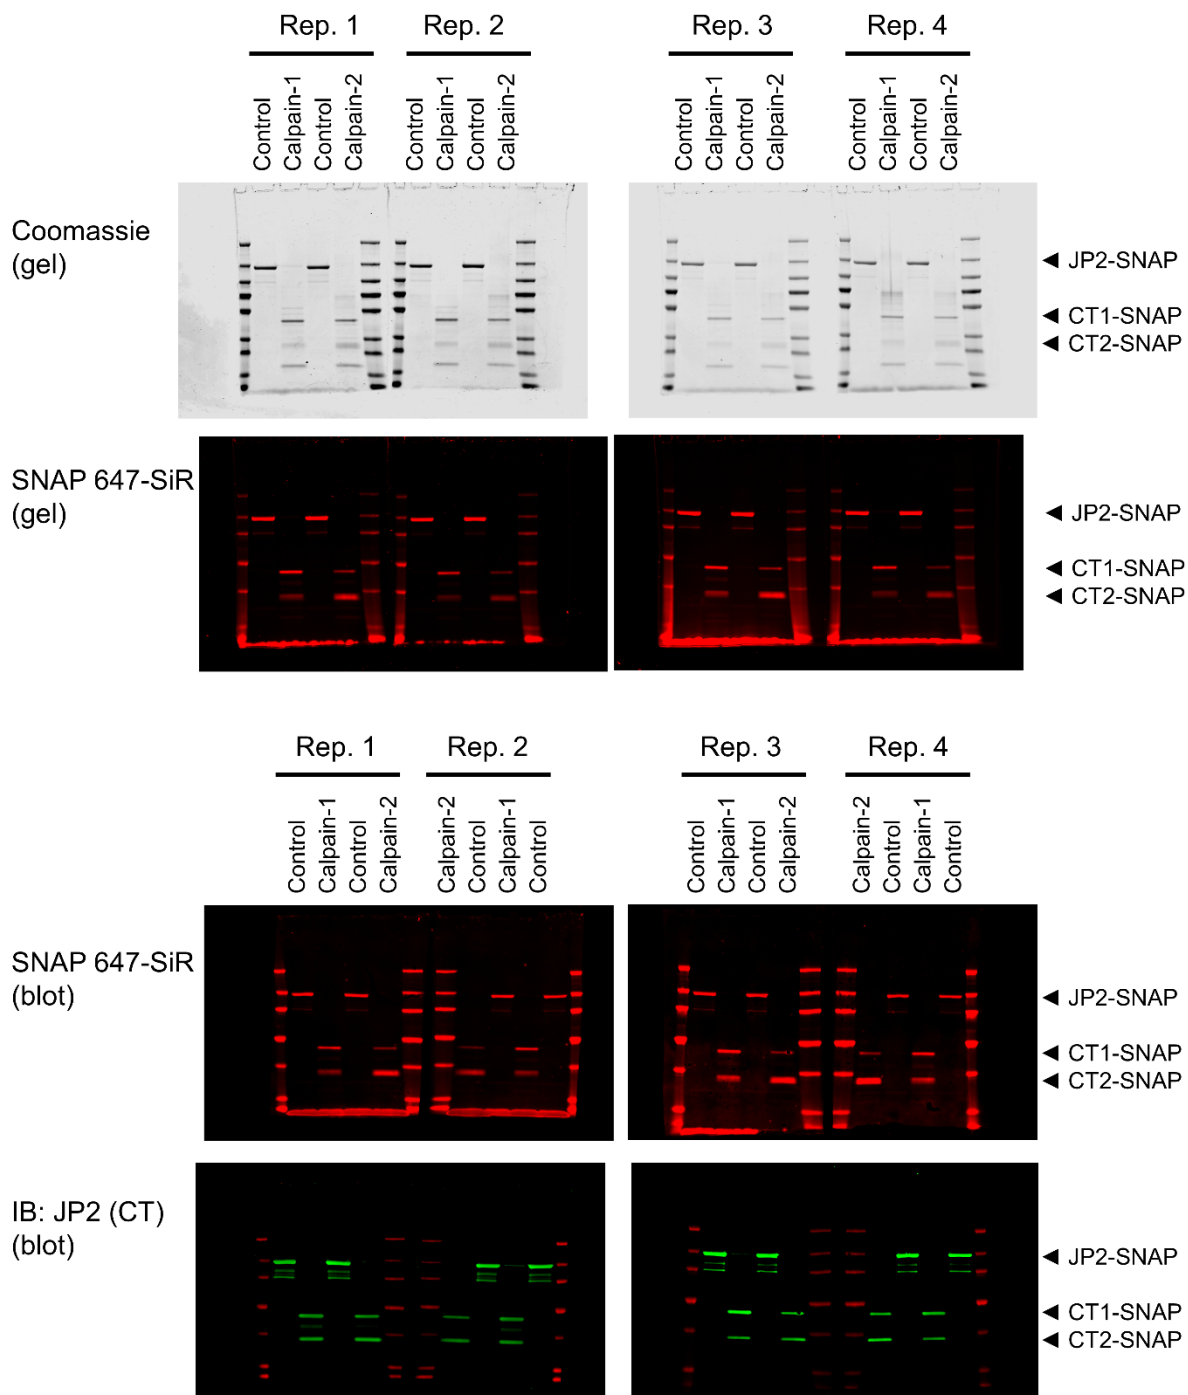

**Figure S10.** Original blot and gel images (1/3). Complementary original images to Fig. 3 in quadruplicate. Protein bands of interest for Fig. 3 are indicated.

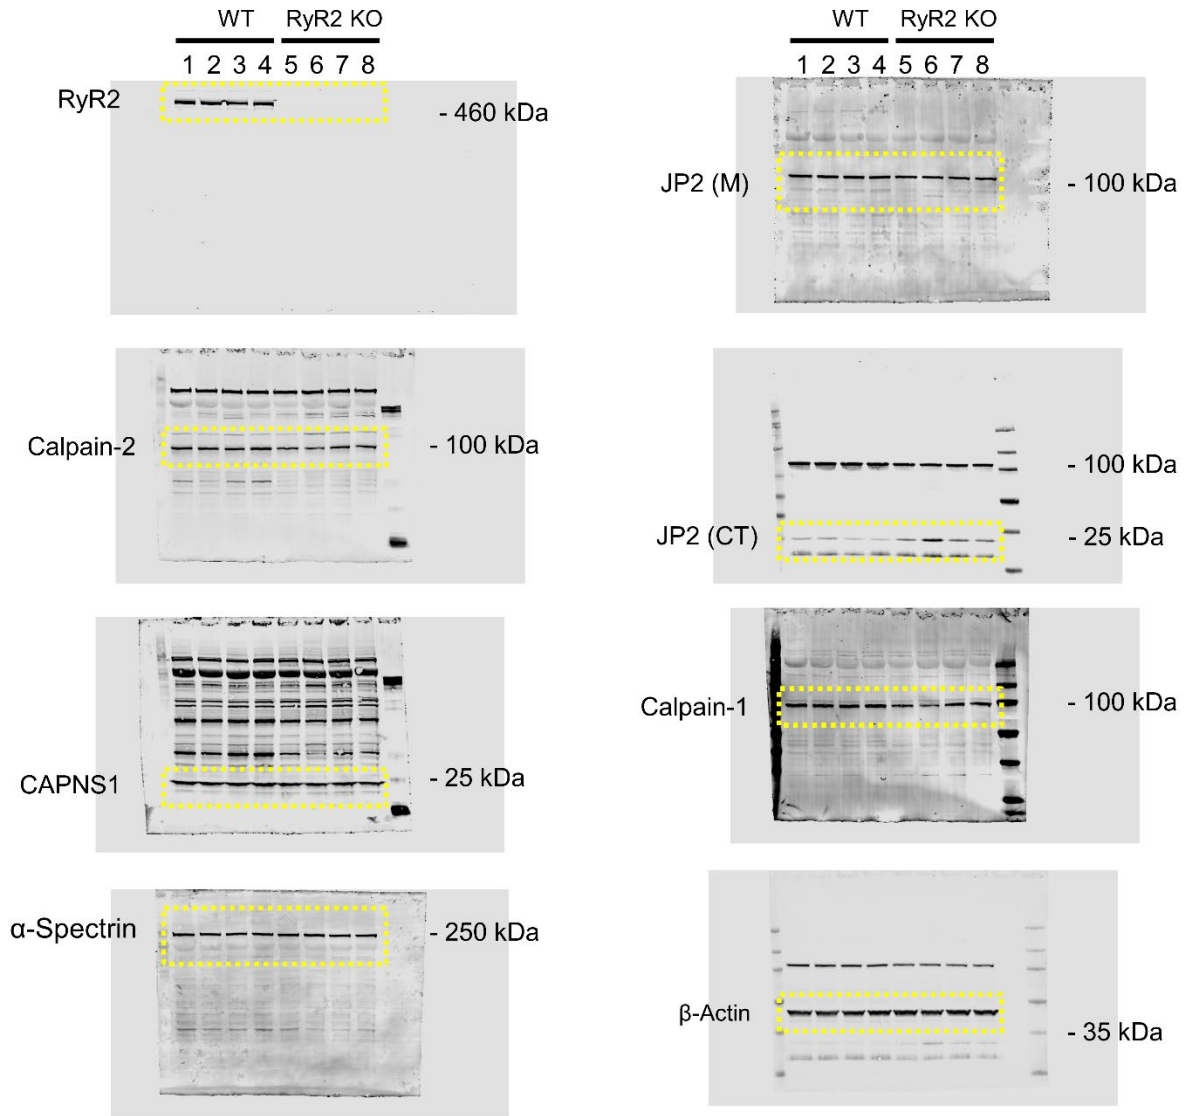

**Figure S10.** Original blot and gel images (2/3). Fig. 6A is based on lanes 1-8 from the original file. Protein bands of interest for Fig. 6A are indicated.

Full blots for Fig. S3

REVERT  
total  
protein  
stain

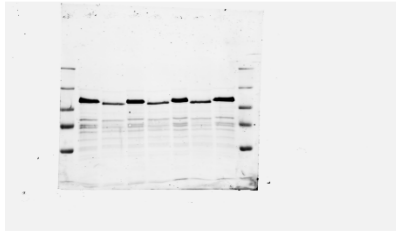

JP2

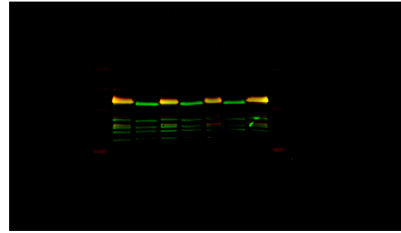

- 100 kDa

Full blots for Fig. S6

REVERT  
total  
protein  
stain

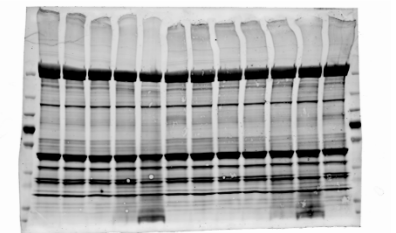

JP2

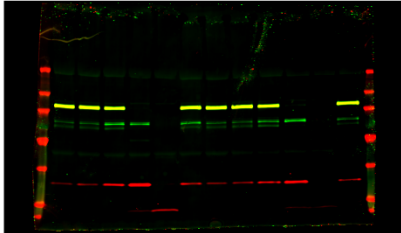

- 100 kDa

- 25 kDa

GAPDH

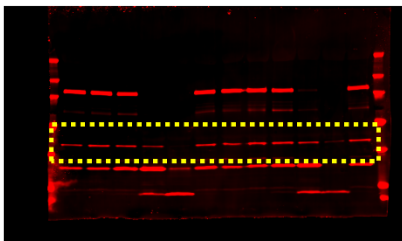

- 35 kDa

RyR2

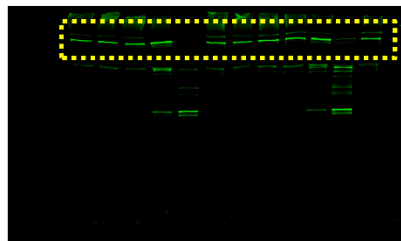

- 250 kDa

Cav3

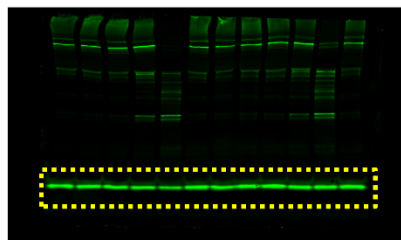

- 25 kDa

**Figure S10.** Original blot and gel images (3/3). Full blots for Fig. S3 and S6. Protein bands of interest for Fig. S3 and S6 are indicated.
