# Supplementary material for: Calpain cleavage of Junctophilin-2 generates a spectrum of calcium-dependent cleavage products and DNA-rich NT1-fragment domains in cardiomyocytes
Source: Sci Rep. 2022 Jun 20;12:10387. doi: 10.1038/s41598-022-14320-9 (PMC9209451; doi:10.1038/s41598-022-14320-9)
Supplement: Supplementary file 1 — Supplementary Information 1. [file 41598_2022_14320_MOESM1_ESM.xlsx]

## Sheet: PRM Results 
Parallel Reaction Monitoring Mass Spectrometry (Fig. 5)
Peptide Peak Areas observed for 15 targeted human JP2 peptides normalized to Fraction 10 AVG
Replicate 1, normalized				PRM		Fraction
Protein	Peptide	Start	Stop	m/z (z)	RT [min]	1	2	3	4	5	6	7	8	9	10	11	12	13	14	15	16	17	18	19	20	21	22	23
Junctophilin-2 OS=Homo sapiens OX=9606 GN=JPH2 PE=1 SV=2	QSVPYGMAVVVR	144	155	661.350 (2)	39.13	0.039	0.056	0.031	0.009	0.033	0	0.044	0.037	0.243	0.969	0.421	0.095	0.028	0.031	0.025	0.047	0.088	0.044	0.026	0.007	0.012	0.006	0.003
Junctophilin-2 OS=Homo sapiens OX=9606 GN=JPH2 PE=1 SV=2	TSLSSLR	160	166	382.219 (2)	26.2	0.043	0.041	0.056	0.044	0.049	0.025	0.089	0.126	0.251	0.892	0.42	0.119	0.048	0.082	0.07	0.032	0.087	0.067	0.089	0.016	0.021	0.008	0.003
Junctophilin-2 OS=Homo sapiens OX=9606 GN=JPH2 PE=1 SV=2	GGFALSLLANAEAAAR	197	212	766.415 (2)	42.36	0.012	0.022	0.023	0.011	0.026	0.022	0.006	0.037	0.249	0.945	0.413	0.079	0.035	0.034	0.071	0.019	0.07	0.033	0.021	0.008	0.016	0.001	0.006
Junctophilin-2 OS=Homo sapiens OX=9606 GN=JPH2 PE=1 SV=2	SGFGVSER	300	307	419.706 (2)	25.92	0.007	0.01	0.013	0.02	0.012	0.027	0.034	0.039	0.276	0.942	0.468	0.132	0.037	0.048	0.031	0.011	0.025	0.021	0.011	0.006	0.009	0.002	0.001
Junctophilin-2 OS=Homo sapiens OX=9606 GN=JPH2 PE=1 SV=2	YEGEWLDNLR	313	322	647.807 (2)	38.81	0.012	0.012	0.009	0.008	0.012	0.025	0.045	0.044	0.307	0.974	0.487	0.112	0.031	0.049	0.036	0.016	0.023	0.005	0.009	0.006	0.004	0.003	0
Junctophilin-2 OS=Homo sapiens OX=9606 GN=JPH2 PE=1 SV=2	AEAAEQAALAANQESNIAR	397	415	964.477 (2)	32.54	0.007	0.009	0.014	0.006	0.01	0.017	0.041	0.043	0.299	0.968	0.528	0.151	0.025	0.05	0.029	0.029	0.019	0.009	0.011	0.011	0.003	0.001	0
Junctophilin-2 OS=Homo sapiens OX=9606 GN=JPH2 PE=1 SV=2	ELAPDFYQPGPEYQK	420	434	891.425 (2)	36.93	0.012	0.012	0.008	0.007	0.009	0.011	0.04	0.041	0.28	0.993	0.452	0.11	0.034	0.052	0.05	0.009	0.003	0.006	0.005	0.003	0.003	0.001	0
Junctophilin-2 OS=Homo sapiens OX=9606 GN=JPH2 PE=1 SV=2	LLQEILENSESLLEPPDR	437	454	1048.050 (2)	40.14	0.038	0.042	0.04	0.04	0.026	0.049	0.042	0.056	0.296	0.977	0.533	0.146	0.056	0.083	0.058	0.023	0.036	0.044	0.028	0.007	0.019	0.021	0.014
Junctophilin-2 OS=Homo sapiens OX=9606 GN=JPH2 PE=1 SV=2	GAGAAGLPQPPR	455	466	546.301 (2)	29.05	0.022	0.013	0.015	0.012	0.016	0	0	0.04	0.122	0.954	0.405	0.226	0.044	0.086	0.115	0.043	0.019	0.016	0.009	0.014	0.012	0.004	0.002
Junctophilin-2 OS=Homo sapiens OX=9606 GN=JPH2 PE=1 SV=2	DGLLSPGAWNGEPSGEGSR	503	521	943.437 (2)	38.55	0.005	0.004	0.007	0.005	0.003	0.041	0.047	0.03	0.319	1.051	0.353	0.087	0.023	0.022	0.027	0.018	0.008	0.012	0.006	0.003	0.003	0.001	0
Junctophilin-2 OS=Homo sapiens OX=9606 GN=JPH2 PE=1 SV=2	MAIEALQAPPAPSR	542	555	734.385 (2)	32.7	0.004	0.004	0.003	0.003	0.004	0.025	0.025	0.031	0.262	0.961	0.243	0.088	0.049	0.029	0.02	0.009	0.101	0.014	0.006	0.005	0.002	0.002	0
Junctophilin-2 OS=Homo sapiens OX=9606 GN=JPH2 PE=1 SV=2	EPEVALYQGYHSYAVR	556	571	941.460 (2)	39.48	0.012	0.025	0.006	0.01	0.01	0.055	0.034	0.028	0.266	0.96	0.129	0.093	0.07	0.088	0.055	0	0.116	0.07	0.028	0.004	0.007	0.002	0.002
Junctophilin-2 OS=Homo sapiens OX=9606 GN=JPH2 PE=1 SV=2	TTPPEPPPFEDQPEPEVSGSESAPSSPATAPLQAPTLR	572	609	978.726 (4)	38.52	0.01	0.009	0.007	0.005	0.007	0.034	0.058	0	0.329	1.057	0.084	0.085	0.102	0.046	0.049	0.035	0.123	0.071	0.263	0.005	0.003	0.002	0.002
Junctophilin-2 OS=Homo sapiens OX=9606 GN=JPH2 PE=1 SV=2	LEPKPIIPK	621	629	517.834 (2)	29.33	0.015	0.004	0.003	0.009	0.016	0.024	0.044	0.036	0.29	0.956	0.073	0.045	0.053	0.047	0.041	0.036	0.102	0.06	0.203	0.009	0.009	0.001	0.004
Replicate 2, normalized				PRM		Fraction
Protein	Peptide	Start	Stop	m/z (z)	RT [min]	1	2	3	4	5	6	7	8	9	10	11	12	13	14	15	16	17	18	19	20	21	22	23
Junctophilin-2 OS=Homo sapiens OX=9606 GN=JPH2 PE=1 SV=2	QSVPYGMAVVVR	144	155	661.350 (2)	39.13	0.049	0.048	0.047	0.024	0.048	0	0.06	0.042	0.286	1.031	0.495	0.091	0.052	0.03	0.015	0.025	0.097	0.044	0.041	0.01	0.01	0.003	0.003
Junctophilin-2 OS=Homo sapiens OX=9606 GN=JPH2 PE=1 SV=2	TSLSSLR	160	166	382.219 (2)	26.2	0.027	0.029	0.051	0.046	0.049	0.071	0.106	0.129	0.304	1.108	0.478	0.152	0.059	0.092	0.072	0.051	0.106	0.07	0.105	0.019	0.019	0.006	0.003
Junctophilin-2 OS=Homo sapiens OX=9606 GN=JPH2 PE=1 SV=2	GGFALSLLANAEAAAR	197	212	766.415 (2)	42.36	0.017	0.023	0.016	0.017	0.023	0.026	0.006	0.03	0.253	1.055	0.435	0.084	0.029	0.031	0.054	0.032	0.065	0.021	0.023	0.005	0.016	0.007	0.003
Junctophilin-2 OS=Homo sapiens OX=9606 GN=JPH2 PE=1 SV=2	SGFGVSER	300	307	419.706 (2)	25.92	0.005	0.01	0.013	0.014	0.011	0.027	0.04	0.056	0.299	1.058	0.511	0.149	0.042	0.049	0.037	0.012	0.002	0.023	0.013	0.004	0.008	0.002	0.001
Junctophilin-2 OS=Homo sapiens OX=9606 GN=JPH2 PE=1 SV=2	YEGEWLDNLR	313	322	647.807 (2)	38.81	0.012	0.008	0.008	0.011	0.012	0.029	0.046	0.052	0.335	1.026	0.54	0.128	0.031	0.051	0.042	0.015	0.012	0.006	0.011	0.006	0.005	0.002	0.001
Junctophilin-2 OS=Homo sapiens OX=9606 GN=JPH2 PE=1 SV=2	AEAAEQAALAANQESNIAR	397	415	964.477 (2)	32.54	0.004	0.007	0.009	0.004	0.009	0.029	0.043	0.034	0.287	1.032	0.537	0.149	0.027	0.039	0.033	0.022	0.015	0.009	0.009	0.01	0.003	0.002	0
Junctophilin-2 OS=Homo sapiens OX=9606 GN=JPH2 PE=1 SV=2	ELAPDFYQPGPEYQK	420	434	891.425 (2)	36.93	0.013	0.009	0.007	0.007	0.009	0.031	0.037	0.042	0.299	1.007	0.494	0.108	0.032	0.051	0.038	0.01	0.006	0.007	0.005	0.002	0.001	0.001	0
Junctophilin-2 OS=Homo sapiens OX=9606 GN=JPH2 PE=1 SV=2	LLQEILENSESLLEPPDR	437	454	1048.050 (2)	40.14	0.033	0.043	0.041	0.037	0.032	0.041	0.049	0.036	0.305	1.023	0.522	0.162	0.075	0.061	0.069	0.032	0.016	0.046	0.045	0.01	0.031	0.022	0.015
Junctophilin-2 OS=Homo sapiens OX=9606 GN=JPH2 PE=1 SV=2	GAGAAGLPQPPR	455	466	546.301 (2)	29.05	0.016	0.016	0.008	0.009	0.022	0	0	0.055	0.254	1.046	0.461	0.319	0.049	0.067	0.143	0.05	0.026	0.007	0.013	0.015	0.012	0.001	0.001
Junctophilin-2 OS=Homo sapiens OX=9606 GN=JPH2 PE=1 SV=2	DGLLSPGAWNGEPSGEGSR	503	521	943.437 (2)	38.55	0.005	0.006	0.006	0.004	0.005	0.035	0.042	0.018	0.277	0.949	0.39	0.056	0.028	0.03	0.026	0.01	0.01	0.007	0.009	0.004	0.001	0.001	0
Junctophilin-2 OS=Homo sapiens OX=9606 GN=JPH2 PE=1 SV=2	MAIEALQAPPAPSR	542	555	734.385 (2)	32.7	0.005	0.003	0.003	0.003	0.004	0.024	0.039	0.033	0.297	1.039	0.252	0.106	0.033	0.024	0.02	0.01	0.08	0.024	0.002	0.002	0.003	0.002	0
Junctophilin-2 OS=Homo sapiens OX=9606 GN=JPH2 PE=1 SV=2	EPEVALYQGYHSYAVR	556	571	941.460 (2)	39.48	0.012	0.019	0.007	0.009	0.008	0.061	0.04	0.028	0.318	1.04	0.117	0.085	0.05	0.054	0.045	0	0.1	0.02	0.006	0.006	0.008	0.003	0
Junctophilin-2 OS=Homo sapiens OX=9606 GN=JPH2 PE=1 SV=2	TTPPEPPPFEDQPEPEVSGSESAPSSPATAPLQAPTLR	572	609	978.726 (4)	38.52	0.007	0.007	0.005	0.007	0.006	0.033	0.037	0	0.291	0.943	0.081	0.082	0.102	0.049	0.044	0.034	0.099	0.065	0.226	0.004	0.003	0.001	0.002
Junctophilin-2 OS=Homo sapiens OX=9606 GN=JPH2 PE=1 SV=2	LEPKPIIPK	621	629	517.834 (2)	29.33	0.017	0.013	0.013	0.01	0.014	0.018	0.035	0.028	0.343	1.044	0.055	0.073	0.104	0.043	0.063	0.044	0.105	0.049	0.213	0.015	0.02	0.001	0.003
Average, normalized				PRM		Fraction
Protein	Peptide	Start	Stop	m/z (z)	RT [min]	1	2	3	4	5	6	7	8	9	10	11	12	13	14	15	16	17	18	19	20	21	22	23
Junctophilin-2 OS=Homo sapiens OX=9606 GN=JPH2 PE=1 SV=2	QSVPYGMAVVVR	144	155	661.350 (2)	39.13	0.044	0.052	0.039	0.016	0.04	0	0.052	0.04	0.265	1	0.458	0.093	0.04	0.03	0.02	0.036	0.092	0.044	0.034	0.009	0.011	0.005	0.003
Junctophilin-2 OS=Homo sapiens OX=9606 GN=JPH2 PE=1 SV=2	TSLSSLR	160	166	382.219 (2)	26.2	0.035	0.035	0.054	0.045	0.049	0.048	0.098	0.128	0.277	1	0.449	0.135	0.053	0.087	0.071	0.041	0.097	0.068	0.097	0.018	0.02	0.007	0.003
Junctophilin-2 OS=Homo sapiens OX=9606 GN=JPH2 PE=1 SV=2	GGFALSLLANAEAAAR	197	212	766.415 (2)	42.36	0.014	0.023	0.02	0.014	0.025	0.024	0.006	0.034	0.251	1	0.424	0.081	0.032	0.032	0.063	0.025	0.067	0.027	0.022	0.007	0.016	0.004	0.005
Junctophilin-2 OS=Homo sapiens OX=9606 GN=JPH2 PE=1 SV=2	SGFGVSER	300	307	419.706 (2)	25.92	0.006	0.01	0.013	0.017	0.011	0.027	0.037	0.047	0.287	1	0.49	0.14	0.039	0.048	0.034	0.012	0.014	0.022	0.012	0.005	0.008	0.002	0.001
Junctophilin-2 OS=Homo sapiens OX=9606 GN=JPH2 PE=1 SV=2	YEGEWLDNLR	313	322	647.807 (2)	38.81	0.012	0.01	0.009	0.01	0.012	0.027	0.045	0.048	0.321	1	0.514	0.12	0.031	0.05	0.039	0.015	0.018	0.005	0.01	0.006	0.004	0.002	0
Junctophilin-2 OS=Homo sapiens OX=9606 GN=JPH2 PE=1 SV=2	AEAAEQAALAANQESNIAR	397	415	964.477 (2)	32.54	0.005	0.008	0.012	0.005	0.01	0.023	0.042	0.039	0.293	1	0.533	0.15	0.026	0.044	0.031	0.026	0.017	0.009	0.01	0.01	0.003	0.001	0
Junctophilin-2 OS=Homo sapiens OX=9606 GN=JPH2 PE=1 SV=2	ELAPDFYQPGPEYQK	420	434	891.425 (2)	36.93	0.013	0.011	0.007	0.007	0.009	0.021	0.038	0.042	0.29	1	0.473	0.109	0.033	0.052	0.044	0.009	0.004	0.006	0.005	0.002	0.002	0.001	0
Junctophilin-2 OS=Homo sapiens OX=9606 GN=JPH2 PE=1 SV=2	LLQEILENSESLLEPPDR	437	454	1048.050 (2)	40.14	0.035	0.043	0.041	0.038	0.029	0.045	0.046	0.046	0.3	1	0.528	0.154	0.065	0.072	0.064	0.028	0.026	0.045	0.036	0.008	0.025	0.021	0.015
Junctophilin-2 OS=Homo sapiens OX=9606 GN=JPH2 PE=1 SV=2	GAGAAGLPQPPR	455	466	546.301 (2)	29.05	0.019	0.015	0.011	0.01	0.019	0	0	0.048	0.188	1	0.433	0.272	0.047	0.076	0.129	0.046	0.022	0.011	0.011	0.015	0.012	0.002	0.001
Junctophilin-2 OS=Homo sapiens OX=9606 GN=JPH2 PE=1 SV=2	DGLLSPGAWNGEPSGEGSR	503	521	943.437 (2)	38.55	0.005	0.005	0.006	0.004	0.004	0.038	0.045	0.024	0.298	1	0.371	0.072	0.026	0.026	0.027	0.014	0.009	0.01	0.007	0.004	0.002	0.001	0
Junctophilin-2 OS=Homo sapiens OX=9606 GN=JPH2 PE=1 SV=2	MAIEALQAPPAPSR	542	555	734.385 (2)	32.7	0.005	0.004	0.003	0.003	0.004	0.024	0.032	0.032	0.28	1	0.247	0.097	0.041	0.026	0.02	0.009	0.09	0.019	0.004	0.003	0.002	0.002	0
Junctophilin-2 OS=Homo sapiens OX=9606 GN=JPH2 PE=1 SV=2	EPEVALYQGYHSYAVR	556	571	941.460 (2)	39.48	0.012	0.022	0.007	0.009	0.009	0.058	0.037	0.028	0.292	1	0.123	0.089	0.06	0.071	0.05	0	0.108	0.045	0.017	0.005	0.007	0.003	0.001
Junctophilin-2 OS=Homo sapiens OX=9606 GN=JPH2 PE=1 SV=2	TTPPEPPPFEDQPEPEVSGSESAPSSPATAPLQAPTLR	572	609	978.726 (4)	38.52	0.008	0.008	0.006	0.006	0.007	0.034	0.047	0	0.31	1	0.082	0.084	0.102	0.048	0.046	0.034	0.111	0.068	0.245	0.004	0.003	0.001	0.002
Junctophilin-2 OS=Homo sapiens OX=9606 GN=JPH2 PE=1 SV=2	LEPKPIIPK	621	629	517.834 (2)	29.33	0.016	0.008	0.008	0.009	0.015	0.021	0.039	0.032	0.316	1	0.064	0.059	0.078	0.045	0.052	0.04	0.104	0.054	0.208	0.012	0.014	0.001	0.004
