# Supplementary material for: Calpain cleavage of Junctophilin-2 generates a spectrum of calcium-dependent cleavage products and DNA-rich NT1-fragment domains in cardiomyocytes
Source: Sci Rep. 2022 Jun 20;12:10387. doi: 10.1038/s41598-022-14320-9 (PMC9209451; doi:10.1038/s41598-022-14320-9)
Supplement: Supplementary file 3 — Supplementary Information 3. [file 41598_2022_14320_MOESM3_ESM.xlsx]

## Sheet: Spectral Count Results
Spectral Counting Analysis Results (Fig. 1)
Raw and Averaged Spectral Counts observed for Mouse JP2 peptides normalized to FL AVG
empty cells: not observed
Gel 1 Replicate 1, normalized				Fraction
Protein	Peptide	Start	Stop	#6_A	#6_B	#6_F	#5_B	#5_C	#5_F	#4_C	#3_B	#6_F	#6_F	#6_F	#6_F	#5_B	#5_B	#5_B	#5_B	#5_C	#5_C
Junctophilin-2 OS=Mus musculus OX=10090 GN=Jph2 PE=1 SV=2	GPLGSMSGGR	-4	5	1.00787	0.850394	0.472441	0.661417	0.724409	0.818898	0.251969	0.15748	0.0944882	0.0944882	0.220472	0.251969	0.251969	0.220472	0.283465	0.913386	1.38583	2.29921
Junctophilin-2 OS=Mus musculus OX=10090 GN=Jph2 PE=1 SV=2	FDFDDGGAYCGGWEGGK	6	22	1.40606	0.824242	0.484848	0.436364	0.581818	0.436364	0.193939	0.0969697	0.193939	0.0969697	0.242424	0.290909	0.242424	0.242424	0.436364	0.533333	0.339394	2.61818
Junctophilin-2 OS=Mus musculus OX=10090 GN=Jph2 PE=1 SV=2	AHGHGLCTGPK	23	33	0.311688	1.61039	1.2987	1.35065	1.2987	1.03896	0.727273	0.363636	0.207792	0.103896	0.155844	0.519481	0.467532	0.311688	0.415584	1.61039	1.03896	1.2987
Junctophilin-2 OS=Mus musculus OX=10090 GN=Jph2 PE=1 SV=2	RHGLGIETK	69	77	1.90476	0.190476	0.190476	0.190476	0.571429	0.380952										0.761905	0.952381	1.52381
Junctophilin-2 OS=Mus musculus OX=10090 GN=Jph2 PE=1 SV=2	HGLGIETK	70	77	1.25253	0.929293	0.767677	0.727273	1.0101	1.09091	0.40404	0.282828	0.20202	0.20202	0.606061	0.363636	0.323232	0.363636	0.484848	1.61616	1.45455	3.59596
Junctophilin-2 OS=Mus musculus OX=10090 GN=Jph2 PE=1 SV=2	GEWTHGFK	84	91	1.30233	1.11628	0.744186	0.55814	0.837209	1.02326	0.372093	0.27907	0.27907	0.372093	0.372093	0.465116	0.465116	0.372093	0.372093	1.2093	1.2093	1.86047
Junctophilin-2 OS=Mus musculus OX=10090 GN=Jph2 PE=1 SV=2	QSVPYGMAVVVR	145	156	1.21905	0.895238	0.8	0.533333	0.933333	0.895238	0.114286	0.0952381	0.0952381	0.114286	0.228571	0.209524	0.133333	0.133333	0.209524	0.666667	0.952381	1.21905
Junctophilin-2 OS=Mus musculus OX=10090 GN=Jph2 PE=1 SV=2	TSLSSLR	161	167	1.13208	0.792453	0.603774	0.679245	0.830189	1.09434	0.264151	0.188679	0.150943	0.0754717	0.301887	0.264151	0.226415	0.113208	0.264151	0.415094	0.226415	0.113208
Junctophilin-2 OS=Mus musculus OX=10090 GN=Jph2 PE=1 SV=2	GGFALTLLATAEAAR	195	209	0.923077	1	1.15385	0.692308	1	0.769231	0.384615				0.153846	0.230769			0.0769231		0.0769231	0.153846
Junctophilin-2 OS=Mus musculus OX=10090 GN=Jph2 PE=1 SV=2	GGFALTLLATAEAARPQGLFTR	195	216	0.592593	1.38272	0.987654	1.18519	1.58025	1.18519	0.592593	0.296296			0.0987654	0.395062			0.0987654	0.296296	0.0987654	0.0987654
Junctophilin-2 OS=Mus musculus OX=10090 GN=Jph2 PE=1 SV=2	PQGLFTR	210	216	1.06667	0.96	0.746667	0.746667	1.06667	0.96	0.853333	0.426667	0.32			0.426667	0.213333		0.32
Junctophilin-2 OS=Mus musculus OX=10090 GN=Jph2 PE=1 SV=2	TSLGSQR	230	236	0.927536	1.04348	0.57971	1.27536	0.115942	0.57971	0.927536	0.463768	0.463768	0.695652		0.115942			0.115942
Junctophilin-2 OS=Mus musculus OX=10090 GN=Jph2 PE=1 SV=2	SGFGVSER	295	302	1.02256	1.02256	0.781955	0.781955	1.14286	1.44361	0.541353	0.421053	1.02256	1.62406	0.240602	0.421053	0.360902	1.08271	0.360902	0.300752	0.300752	0.360902
Junctophilin-2 OS=Mus musculus OX=10090 GN=Jph2 PE=1 SV=2	YEGEWLDNLR	308	317	0.25	1.03571	0.714286	0.571429	0.892857	1.17857	0.321429	0.285714	0.785714	1.42857	0.142857	0.142857	0.25	0.535714	0.178571	0.107143	0.142857	0.214286
Junctophilin-2 OS=Mus musculus OX=10090 GN=Jph2 PE=1 SV=2	TTLPDGHREEGK	323	334	0.859504	0.991736	0.727273	0.92562	0.92562	1.05785	0.727273	0.46281	0.595041	1.12397		0.0661157	0.0661157	0.727273				0.0661157
Junctophilin-2 OS=Mus musculus OX=10090 GN=Jph2 PE=1 SV=2	TTLPDGHR	323	330	1.14286	0.935065	0.935065	0.623377	0.831169	0.831169	0.519481	0.727273	0.831169	0.831169		0.103896	0.103896	0.831169				0.207792
Junctophilin-2 OS=Mus musculus OX=10090 GN=Jph2 PE=1 SV=2	LLQEILENSESLLEPPER	360	369	0.727273	1.21212	0.727273	1.57576	1.21212	0.848485	0.606061	0.969697	1.21212	1.81818	0.242424	0.363636	0.969697	1.09091	0.363636	0.121212	0.121212	0.121212
Junctophilin-2 OS=Mus musculus OX=10090 GN=Jph2 PE=1 SV=2	GLGTGLPERPR	378	384		1.18033	0.885246	1.47541	0.196721	1.57377	0.983607	0.885246	1.18033	1.08197	0.393443	0.590164	0.590164	0.786885	0.491803	0.0983607		0.196721
Junctophilin-2 OS=Mus musculus OX=10090 GN=Jph2 PE=1 SV=2	ESPQLHER	390	410	0.951049	0.503497	0.125874	0.321678	0.559441	0.223776	0.013986	0.0839161	0.223776	0.20979	0.027972	0.0559441	0.0559441	0.111888	0.013986	0.0839161	0.0559441	0.0839161
Junctophilin-2 OS=Mus musculus OX=10090 GN=Jph2 PE=1 SV=2	ETPQPEGGPPSPAGTPPQPKRPRPGASK	392	410	1.05916	0.946628	0.648738	0.549441	1.02938	1.01945	0.0959868	0.0926769	0.251552	0.804303	0.0264791	0.0330989	0.0463384	0.109226	0.0198593	0.0397187	0.0430285	0.0860571
Junctophilin-2 OS=Mus musculus OX=10090 GN=Jph2 PE=1 SV=2	ETPQPEGGPPSPAGTPPQPK	415	429	0.981595	1.07975	0.638037	0.588957	0.932515	0.932515	0.343558	0.294479	0.687117	0.638037	0.0490798	0.196319	0.245399	0.539877	0.196319
Junctophilin-2 OS=Mus musculus OX=10090 GN=Jph2 PE=1 SV=2	DGLLSPGSWNGEPGGEGSRPATPSDGAGR	432	449	1.13834	0.948617	0.727273	0.980237	0.853755	0.727273	0.600791	0.252964	0.316206	1.04348		0.0316206	0.0316206	0.284585
Junctophilin-2 OS=Mus musculus OX=10090 GN=Jph2 PE=1 SV=2	RSPARPASEHMAIEALQPPPAPSQEPEVAMYR	450	460	1.10145	1.15942	0.869565	0.927536	1.21739	1.73913	0.521739	0.521739	0.927536	1.56522				0.057971			0.115942	0.231884
Junctophilin-2 OS=Mus musculus OX=10090 GN=Jph2 PE=1 SV=2	GYHSYAVR	461	468	0.947368	0.947368	0.526316	0.842105	0.842105	1.15789	0.736842	0.842105	0.842105	0.842105							0.105263	0.315789
Junctophilin-2 OS=Mus musculus OX=10090 GN=Jph2 PE=1 SV=2	TGPPEPPPLEDEQEPEPEPEPEVR	469	488	1.35294	1.05882	0.882353	1	1	1.29412	0.941176	0.705882	0.823529	0.823529							0.0588235	0.411765
Junctophilin-2 OS=Mus musculus OX=10090 GN=Jph2 PE=1 SV=2	DGLLSPGSWNGEPGGEGSR	497	515	0.988764	0.898876	0.719101	0.539326	0.988764	0.719101	0.449438	0.359551	0.539326	0.629213
Junctophilin-2 OS=Mus musculus OX=10090 GN=Jph2 PE=1 SV=2	PATPSDGAGR	516	525	0.101266	0.810127	0.607595	1.21519	1.11392	1.31646	0.607595	0.708861	0.607595	1.51899			0.101266			0.202532	0.202532	0.405063
Junctophilin-2 OS=Mus musculus OX=10090 GN=Jph2 PE=1 SV=2	SPARPASEHMAIEALQPPPAPSQEPEVAMYR	527	557	0.805755	1.09353	0.345324	0.345324	0.920863	0.57554	0.230216		0.345324	0.460432
Junctophilin-2 OS=Mus musculus OX=10090 GN=Jph2 PE=1 SV=2	PASEHMAIEALQPPPAPSQEPEVAMYR	531	557	1.12575	0.670659	0.694611	0.239521	0.814371	0.57485	0.215569	0.11976	0.167665	0.407186								0.0718563
Junctophilin-2 OS=Mus musculus OX=10090 GN=Jph2 PE=1 SV=2	TGPPEPPPLEDEQEPEPEPEPEVR	566	589	0.328767	0.986301	0.547945								1.64384	1.9726	1.09589		2.52055
Junctophilin-2 OS=Mus musculus OX=10090 GN=Jph2 PE=1 SV=2	RSDSAPPSPVSATVPEEEPPAPR	590	612	1.26027	0.383562	0.60274	0.328767		0.273973		0.164384	0.164384	0.109589	0.767123	0.657534	0.328767		0.931507	0.219178		0.273973
Junctophilin-2 OS=Mus musculus OX=10090 GN=Jph2 PE=1 SV=2	SDSAPPSPVSATVPEEEPPAPR	591	612	1.13475	0.907801	0.907801	0.113475	0.170213	0.0567376					0.737589	0.851064	0.510638		0.851064	0.113475
Junctophilin-2 OS=Mus musculus OX=10090 GN=Jph2 PE=1 SV=2	QATLEPK	619	625	1.18919	0.864865	0.756757	0.432432	0.108108	0.216216			0.108108		0.972973	0.972973	0.864865		1.08108	0.432432
Gel 1 Replicate 2, normalized				Fraction
Protein	Peptide	Start	Stop	#6_A	#6_B	#6_F	#5_B	#5_C	#5_F	#4_C	#3_B	#3_C	#3_D	#2_B	#2_C	#2_D	#2_E	#2_F	#1_C	#1_D	#1_E
Junctophilin-2 OS=Mus musculus OX=10090 GN=Jph2 PE=1 SV=2	GPLGSMSGGR	-4	5	0.944882	0.818898	0.661417	0.598425	0.787402	0.724409	0.377953	0.15748	0.15748	0.0629921	0.283465	0.314961	0.251969	0.188976	0.283465	1.66929	1.79528	1.54331
Junctophilin-2 OS=Mus musculus OX=10090 GN=Jph2 PE=1 SV=2	FDFDDGGAYCGGWEGGK	6	22	0.678788	0.678788	0.436364	0.484848	0.581818	0.533333	0.242424	0.0969697	0.145455	0.242424	0.0969697	0.339394	0.290909	0.242424	0.290909	1.16364	0.775758	1.79394
Junctophilin-2 OS=Mus musculus OX=10090 GN=Jph2 PE=1 SV=2	AHGHGLCTGPK	23	33	1.2987	2.18182	1.35065	1.50649	1.87013	1.55844	0.519481	0.311688	0.363636	0.155844	0.25974	0.623377	0.623377	0.467532	0.415584	2.02597	2.12987	2.44156
Junctophilin-2 OS=Mus musculus OX=10090 GN=Jph2 PE=1 SV=2	RHGLGIETK	69	77	0.380952	0.380952	0.380952	0.380952	0.380952	0.190476										2.09524	2.47619	4.38095
Junctophilin-2 OS=Mus musculus OX=10090 GN=Jph2 PE=1 SV=2	HGLGIETK	70	77	0.808081	1.09091	1.41414	0.686869	0.808081	1.0101	0.484848	0.242424	0.282828	0.282828	0.323232	0.484848	0.40404	0.323232	0.323232	2.26263	2.10101	1.93939
Junctophilin-2 OS=Mus musculus OX=10090 GN=Jph2 PE=1 SV=2	GEWTHGFK	84	91	0.651163	1.02326	0.651163	0.744186	1.02326	0.837209	0.465116	0.27907	0.186047	0.27907	0.27907	0.372093	0.372093	0.27907	0.372093	1.39535	1.39535	1.86047
Junctophilin-2 OS=Mus musculus OX=10090 GN=Jph2 PE=1 SV=2	QSVPYGMAVVVR	145	156	0.87619	0.971429	0.704762	0.838095	1.06667	0.952381	0.228571	0.0952381	0.0952381	0.114286	0.190476	0.266667	0.228571	0.0952381	0.228571	1.14286	0.914286	0.971429
Junctophilin-2 OS=Mus musculus OX=10090 GN=Jph2 PE=1 SV=2	TSLSSLR	161	167	1.01887	0.943396	0.981132	0.716981	1.13208	0.981132	0.264151	0.150943	0.150943	0.113208	0.226415	0.339623	0.226415	0.0754717	0.226415	0.679245	0.264151	0.113208
Junctophilin-2 OS=Mus musculus OX=10090 GN=Jph2 PE=1 SV=2	GGFALTLLATAEAAR	195	209	1	1.15385	0.846154	0.769231	1.15385	0.846154	0.307692					0.307692	0.0769231		0.0769231
Junctophilin-2 OS=Mus musculus OX=10090 GN=Jph2 PE=1 SV=2	GGFALTLLATAEAARPQGLFTR	195	216	1.18519	1.58025	1.48148	0.888889	1.28395	0.888889	0.691358		0.296296	0.0987654		0.395062	0.0987654	0.0987654	0.197531
Junctophilin-2 OS=Mus musculus OX=10090 GN=Jph2 PE=1 SV=2	PQGLFTR	210	216	0.853333	0.96	0.96	0.746667	0.853333	0.853333		0.32	0.213333	0.213333		0.533333	0.106667		0.32
Junctophilin-2 OS=Mus musculus OX=10090 GN=Jph2 PE=1 SV=2	TSLGSQR	230	236	1.73913	1.04348	0.927536	0.57971	1.15942	1.04348	1.27536	0.57971	0.57971	0.347826		0.231884			0.115942
Junctophilin-2 OS=Mus musculus OX=10090 GN=Jph2 PE=1 SV=2	SGFGVSER	295	302	1.02256	1.26316	1.14286	0.842105	1.14286	1.14286	0.721805	0.541353	0.842105	1.68421	0.300752		0.481203	0.721805	0.300752	0.300752	0.360902	0.360902
Junctophilin-2 OS=Mus musculus OX=10090 GN=Jph2 PE=1 SV=2	YEGEWLDNLR	308	317	0.821429	1.10714	0.75	0.928571	1.89286	1.28571	0.5	0.321429	0.678571	1	0.0357143	0.178571	0.25	0.428571	0.178571	0.178571	0.178571	0.178571
Junctophilin-2 OS=Mus musculus OX=10090 GN=Jph2 PE=1 SV=2	TTLPDGHREEGK	323	334	1.05785	1.32231	0.595041	0.793388	0.661157	0.793388	1.32231	0.595041	0.991736	1.52066		0.198347	0.661157	0.396694		0.0661157		0.198347
Junctophilin-2 OS=Mus musculus OX=10090 GN=Jph2 PE=1 SV=2	TTLPDGHR	323	330	1.03896	1.03896	0.935065	1.03896	1.24675		0.519481	0.415584	0.623377	0.727273		0.103896	0.103896	0.623377				0.207792
Junctophilin-2 OS=Mus musculus OX=10090 GN=Jph2 PE=1 SV=2	LLQEILENSESLLEPPER	360	369	1.69697	0.848485	0.969697	0.848485	0.969697	1.93939	1.33333	1.21212	1.09091	2.06061	0.242424	0.363636	1.09091	0.484848	0.242424	0.121212	0.242424	0.363636
Junctophilin-2 OS=Mus musculus OX=10090 GN=Jph2 PE=1 SV=2	GLGTGLPERPR	378	384	1.18033	1.08197	1.08197	1.08197	1.27869	1.18033	1.08197	1.08197	1.27869	1.86885	0.393443	0.590164	0.491803	0.983607	0.590164	0.196721		0.0983607
Junctophilin-2 OS=Mus musculus OX=10090 GN=Jph2 PE=1 SV=2	ESPQLHER	390	410	1.46853	0.713287	0.223776	0.755245	0.657343	0.111888	0.125874	0.111888	0.167832	0.307692	0.013986	0.027972	0.0699301	0.0979021	0.0559441
Junctophilin-2 OS=Mus musculus OX=10090 GN=Jph2 PE=1 SV=2	ETPQPEGGPPSPAGTPPQPKRPRPGASK	392	410	1.02938	0.867191	0.513033	0.840712	0.863881	0.992966	0.125776	0.0794373	0.264791	0.940008	0.0198593	0.0364088	0.0529582	0.0695077	0.0397187	0.00330989		0.00661978
Junctophilin-2 OS=Mus musculus OX=10090 GN=Jph2 PE=1 SV=2	ETPQPEGGPPSPAGTPPQPK	415	429	0.932515	1.03067	0.539877	0.785276	1.03067	0.883436	0.392638	0.343558	0.539877	0.883436		0.196319	0.196319	0.441718	0.147239
Junctophilin-2 OS=Mus musculus OX=10090 GN=Jph2 PE=1 SV=2	DGLLSPGSWNGEPGGEGSRPATPSDGAGR	432	449	0.853755	0.853755	1.10672	0.632411	0.980237	0.758893	0.600791	0.0948617	0.347826	0.853755		0.0316206	0.0316206	0.379447
Junctophilin-2 OS=Mus musculus OX=10090 GN=Jph2 PE=1 SV=2	RSPARPASEHMAIEALQPPPAPSQEPEVAMYR	450	460	0.695652	1.3913	0.869565	0.927536	1.10145	1.44928	0.927536	0.637681	1.10145	1.62319							0.115942	0.173913
Junctophilin-2 OS=Mus musculus OX=10090 GN=Jph2 PE=1 SV=2	GYHSYAVR	461	468	1.36842	1.26316	0.631579	0.631579	0.736842	0.842105	0.631579	0.842105	1.26316	1.36842							0.105263	0.421053
Junctophilin-2 OS=Mus musculus OX=10090 GN=Jph2 PE=1 SV=2	TGPPEPPPLEDEQEPEPEPEPEVR	469	488	0.882353	1	0.705882	0.764706	0.941176	1.35294	0.823529	0.705882	0.941176	1							0.0588235	0.529412
Junctophilin-2 OS=Mus musculus OX=10090 GN=Jph2 PE=1 SV=2	DGLLSPGSWNGEPGGEGSR	497	515	0.808989	0.898876	0.808989	0.719101	0.988764	0.449438	0.539326	0.269663	0.539326	0.898876
Junctophilin-2 OS=Mus musculus OX=10090 GN=Jph2 PE=1 SV=2	PATPSDGAGR	516	525	1.72152	0.911392	0.810127	0.708861	0.607595	1.21519	0.810127	0.506329	0.708861	1.01266	0.101266	0.101266	0.101266		0.101266	0.101266	0.303797	0.607595
Junctophilin-2 OS=Mus musculus OX=10090 GN=Jph2 PE=1 SV=2	SPARPASEHMAIEALQPPPAPSQEPEVAMYR	527	557	1.09353	1.20863	0.345324	0.517986	0.633094	0.402878	0.230216	0.057554	0.230216	0.748201
Junctophilin-2 OS=Mus musculus OX=10090 GN=Jph2 PE=1 SV=2	PASEHMAIEALQPPPAPSQEPEVAMYR	531	557	0.766467	0.598802	0.646707	0.431138	0.57485	0.502994	0.167665	0.0958084	0.239521	0.502994								0.0958084
Junctophilin-2 OS=Mus musculus OX=10090 GN=Jph2 PE=1 SV=2	TGPPEPPPLEDEQEPEPEPEPEVR	566	589	1.09589	1.20548									1.42466	1.9726	0.986301		2.19178			0.109589
Junctophilin-2 OS=Mus musculus OX=10090 GN=Jph2 PE=1 SV=2	RSDSAPPSPVSATVPEEEPPAPR	590	612	1.20548	1.09589	0.821918	0.383562	0.273973	0.219178		0.219178	0.219178	0.219178	0.493151	1.0411			1.09589	0.273973	0.109589	0.219178
Junctophilin-2 OS=Mus musculus OX=10090 GN=Jph2 PE=1 SV=2	SDSAPPSPVSATVPEEEPPAPR	591	612	1.02128	0.851064	0.794326	0.22695	0.113475	0.0567376					0.737589	0.964539	0.794326		0.851064	0.0567376
Junctophilin-2 OS=Mus musculus OX=10090 GN=Jph2 PE=1 SV=2	QATLEPK	619	625	0.756757	0.864865	1.08108	0.324324	0.108108	0.108108					0.972973	0.864865	0.972973		1.08108	0.324324
Gel 2 Replicate 1, normalized				Fraction
Protein	Peptide	Start	Stop	#6_A	#6_B	#6_F	#5_B	#5_C	#5_F	#4_C	#3_B	#3_C	#3_D	#2_B	#2_C	#2_D	#2_E	#2_F	#1_C	#1_D	#1_E
Junctophilin-2 OS=Mus musculus OX=10090 GN=Jph2 PE=1 SV=2	GPLGSMSGGR	-4	5	1.29134	1.13386	0.692913	0.850394	0.755906	0.787402	0.346457	0.15748	0.188976	0.125984	0.346457	0.566929	0.346457	0.283465	0.251969	1.44882	1.6063	1.66929
Junctophilin-2 OS=Mus musculus OX=10090 GN=Jph2 PE=1 SV=2	FDFDDGGAYCGGWEGGK	6	22	0.775758	0.969697	0.533333	0.630303	0.727273	0.727273	0.290909	0.145455	0.242424	0.193939	0.193939	0.242424	0.339394	0.339394	0.290909	0.775758	1.40606	2.42424
Junctophilin-2 OS=Mus musculus OX=10090 GN=Jph2 PE=1 SV=2	AHGHGLCTGPK	23	33	0.415584	0.987013	1.09091	0.935065	0.727273	0.779221	0.779221	0.155844	0.155844	0.311688	0.415584	0.727273	0.623377	0.519481	0.519481	0.935065	0.727273	0.883117
Junctophilin-2 OS=Mus musculus OX=10090 GN=Jph2 PE=1 SV=2	RHGLGIETK	69	77	1.33333	0.952381	0.571429	0.952381	0.761905	1.33333							0.190476			1.90476	2.28571	1.71429
Junctophilin-2 OS=Mus musculus OX=10090 GN=Jph2 PE=1 SV=2	HGLGIETK	70	77	1.05051	0.767677	0.525253	0.767677	0.808081	0.727273	0.444444	0.323232	0.282828	0.363636	0.484848	0.40404	0.323232	0.484848	0.40404	0.767677	2.10101	1.89899
Junctophilin-2 OS=Mus musculus OX=10090 GN=Jph2 PE=1 SV=2	GEWTHGFK	84	91	0.930233	0.744186	0.465116	0.651163	0.651163	0.837209	0.55814	0.372093	0.27907	0.27907	0.55814	0.372093	0.55814	0.465116	0.465116	1.11628	1.76744	1.39535
Junctophilin-2 OS=Mus musculus OX=10090 GN=Jph2 PE=1 SV=2	QSVPYGMAVVVR	145	156	1.00952	0.971429	0.495238	0.87619	0.838095	0.914286	0.285714	0.133333	0.152381	0.114286	0.266667	0.380952	0.304762	0.285714	0.209524	1.21905	1.2	1.14286
Junctophilin-2 OS=Mus musculus OX=10090 GN=Jph2 PE=1 SV=2	TSLSSLR	161	167	1.32075	0.943396	0.528302	0.415094	0.716981	0.754717	0.301887	0.188679	0.188679	0.113208	0.226415	0.264151	0.264151	0.264151	0.226415	0.301887	0.301887	0.150943
Junctophilin-2 OS=Mus musculus OX=10090 GN=Jph2 PE=1 SV=2	GGFALTLLATAEAAR	195	209	0.692308	1.15385	0.307692	0.923077	1.07692	1	0.615385	0.0769231	0.0769231		0.153846	0.615385	0.153846	0.153846	0.0769231	0.153846	0.0769231	0.0769231
Junctophilin-2 OS=Mus musculus OX=10090 GN=Jph2 PE=1 SV=2	GGFALTLLATAEAARPQGLFTR	195	216	0.790123	0.888889	0.493827	1.48148	1.48148	1.48148	1.18519	0.395062	0.197531	0.197531	0.395062	0.395062	0.395062	0.296296	0.296296	0.197531	0.296296	0.493827
Junctophilin-2 OS=Mus musculus OX=10090 GN=Jph2 PE=1 SV=2	PQGLFTR	210	216	0.96	1.06667	0.64	0.96	0.96	0.96	1.06667	0.32	0.426667	0.32	0.32	0.746667	0.213333	0.213333	0.106667	0.106667	0.213333
Junctophilin-2 OS=Mus musculus OX=10090 GN=Jph2 PE=1 SV=2	TSLGSQR	230	236	1.50725	0.463768	0.57971	0.57971	0.57971	0.463768	1.15942	0.347826	0.347826	0.231884	0.115942			0.115942	0.115942
Junctophilin-2 OS=Mus musculus OX=10090 GN=Jph2 PE=1 SV=2	SGFGVSER	295	302	1.02256	0.902256	0.661654	0.661654	0.721805	0.902256	0.661654	0.481203	0.661654	0.962406	0.240602	0.481203	0.541353	0.421053	0.360902	0.481203	0.360902	0.421053
Junctophilin-2 OS=Mus musculus OX=10090 GN=Jph2 PE=1 SV=2	YEGEWLDNLR	308	317	1.03571	1.53571	0.464286	0.785714	0.892857	1.17857	0.607143	0.321429	0.5	0.678571	0.142857	0.214286	0.285714	0.25	0.214286	0.178571	0.25	0.214286
Junctophilin-2 OS=Mus musculus OX=10090 GN=Jph2 PE=1 SV=2	TTLPDGHREEGK	323	334	0.991736	1.05785	0.793388	0.991736	0.330579	0.793388	0.661157	0.528926	0.793388	1.05785	0.0661157	0.198347	0.198347	0.330579	0.198347	0.0661157	0.132231	0.198347
Junctophilin-2 OS=Mus musculus OX=10090 GN=Jph2 PE=1 SV=2	TTLPDGHR	323	330	0.935065	0.935065	0.831169	0.935065	1.03896	0.935065	1.03896	0.519481	0.623377	1.03896		0.311688	0.415584	0.519481			0.207792	0.103896
Junctophilin-2 OS=Mus musculus OX=10090 GN=Jph2 PE=1 SV=2	LLQEILENSESLLEPPER	360	369	0.606061	1.81818	1.69697	1.09091	1.33333	1.33333	1.21212	0.606061	1.21212	1.09091	0.484848	0.363636	0.606061	1.21212	0.242424	0.121212	0.121212	0.121212
Junctophilin-2 OS=Mus musculus OX=10090 GN=Jph2 PE=1 SV=2	GLGTGLPERPR	378	384	0.983607	0.885246	1.37705	0.885246	0.885246	0.786885	1.18033	0.590164	0.885246	1.27869	0.393443	0.491803	0.590164	0.590164	0.491803	0.196721		0.0983607
Junctophilin-2 OS=Mus musculus OX=10090 GN=Jph2 PE=1 SV=2	ESPQLHER	390	410	1.31469	0.993007	0.223776	0.363636	0.41958	0.727273	0.195804	0.125874	0.20979	0.265734	0.0559441	0.0559441	0.0839161	0.0699301	0.041958	0.0699301	0.0559441	0.0699301
Junctophilin-2 OS=Mus musculus OX=10090 GN=Jph2 PE=1 SV=2	ETPQPEGGPPSPAGTPPQPKRPRPGASK	392	410	1.02276	1.00621	0.400496	0.89698	0.913529	0.940008	0.314439	0.0794373	0.337609	0.645428	0.0330989	0.0397187	0.0562681	0.0430285	0.0330989	0.0264791	0.0364088	0.0728175
Junctophilin-2 OS=Mus musculus OX=10090 GN=Jph2 PE=1 SV=2	ETPQPEGGPPSPAGTPPQPK	415	429	1.07975	0.981595	0.490798	0.834356	0.736196	1.12883	0.638037	0.343558	0.539877	0.932515	0.0981595	0.196319	0.343558	0.294479	0.196319	0.0490798	0.0490798	0.0981595
Junctophilin-2 OS=Mus musculus OX=10090 GN=Jph2 PE=1 SV=2	DGLLSPGSWNGEPGGEGSRPATPSDGAGR	432	449	0.822134	1.20158	0.980237	0.632411	1.01186	0.790514	0.695652	0.379447	0.695652	0.758893			0.189723	0.126482				0.0316206
Junctophilin-2 OS=Mus musculus OX=10090 GN=Jph2 PE=1 SV=2	RSPARPASEHMAIEALQPPPAPSQEPEVAMYR	450	460	0.695652	0.869565	0.637681	0.927536	0.811594	0.985507	0.695652	0.521739	0.869565	1.15942								0.173913
Junctophilin-2 OS=Mus musculus OX=10090 GN=Jph2 PE=1 SV=2	GYHSYAVR	461	468	0.947368	0.736842	1.05263	1.05263		0.736842	0.631579	0.631579	0.631579	1.05263							0.210526	0.315789
Junctophilin-2 OS=Mus musculus OX=10090 GN=Jph2 PE=1 SV=2	TGPPEPPPLEDEQEPEPEPEPEVR	469	488	0.764706	0.941176	0.882353	1.17647	0.823529	1.05882	0.941176	0.705882	1.05882	1							0.117647	0.647059
Junctophilin-2 OS=Mus musculus OX=10090 GN=Jph2 PE=1 SV=2	DGLLSPGSWNGEPGGEGSR	497	515	0.988764	1.07865	0.629213	1.07865	0.898876	0.898876	0.808989	0.449438	0.629213	1.07865								0.0898876
Junctophilin-2 OS=Mus musculus OX=10090 GN=Jph2 PE=1 SV=2	PATPSDGAGR	516	525	1.01266	1.51899	1.21519	0.607595	0.810127	0.911392	1.62025	0.607595	0.708861	1.11392		0.101266	0.202532	0.202532	0.101266	0.202532	0.303797	0.506329
Junctophilin-2 OS=Mus musculus OX=10090 GN=Jph2 PE=1 SV=2	SPARPASEHMAIEALQPPPAPSQEPEVAMYR	527	557	1.09353	0.863309	0.517986	0.920863	0.863309	1.26619	0.57554	0.230216	0.57554	0.863309								0.172662
Junctophilin-2 OS=Mus musculus OX=10090 GN=Jph2 PE=1 SV=2	PASEHMAIEALQPPPAPSQEPEVAMYR	531	557	0.958084	1.1497	0.383234	0.670659	0.790419	0.91018	0.502994	0.11976	0.431138	0.766467							0.0239521	0.0958084
Junctophilin-2 OS=Mus musculus OX=10090 GN=Jph2 PE=1 SV=2	TGPPEPPPLEDEQEPEPEPEPEVR	566	589	0.876712	1.42466	1.20548							0.219178	0.986301	1.86301	0.876712	1.64384	2.19178	0.328767	0.219178	0.109589
Junctophilin-2 OS=Mus musculus OX=10090 GN=Jph2 PE=1 SV=2	RSDSAPPSPVSATVPEEEPPAPR	590	612	1.15068	0.931507	0.547945	0.273973	0.273973	0.273973	0.0547945	0.219178	0.219178	0.0547945	0.712329	0.931507	0.712329	0.657534	0.876712	0.328767	0.273973	0.164384
Junctophilin-2 OS=Mus musculus OX=10090 GN=Jph2 PE=1 SV=2	SDSAPPSPVSATVPEEEPPAPR	591	612	0.851064	1.02128	0.737589	0.453901	0.22695	0.283688					0.794326	1.07801	0.851064	0.794326	0.851064	0.22695	0.22695
Junctophilin-2 OS=Mus musculus OX=10090 GN=Jph2 PE=1 SV=2	QATLEPK	619	625	0.864865	0.972973	1.18919	0.540541	0.432432	0.432432			0.216216		0.864865	1.08108	0.972973	0.972973	0.972973
Gel 2 Replicate 2, normalized				Fraction
Protein	Peptide	Start	Stop	#6_A	#6_B	#6_F	#5_B	#5_C	#5_F	#4_C	#3_B	#3_C	#3_D	#2_B	#2_C	#2_D	#2_E	#2_F	#1_C	#1_D	#1_E
Junctophilin-2 OS=Mus musculus OX=10090 GN=Jph2 PE=1 SV=2	GPLGSMSGGR	-4	5	1.79528	0.15748	0.629921	1.03937	0.724409	0.976378	0.346457	0.15748	0.15748	0.0944882	0.283465	0.503937	0.220472	#2_E	0.314961	0.818898	4.25197	1.88976
Junctophilin-2 OS=Mus musculus OX=10090 GN=Jph2 PE=1 SV=2	FDFDDGGAYCGGWEGGK	6	22	1.74545	0.921212	0.484848	0.436364	0.581818	0.533333	0.290909	0.0969697	0.193939	0.0969697	0.242424	0.290909	0.290909	0.188976	0.290909	0.678788	2.18182	1.11515
Junctophilin-2 OS=Mus musculus OX=10090 GN=Jph2 PE=1 SV=2	AHGHGLCTGPK	23	33	0.623377	0.571429	0.831169	1.14286	0.571429	0.987013	0.727273	0.155844		0.207792	0.25974	0.727273	0.675325	0.193939	0.519481	0.987013	1.61039
Junctophilin-2 OS=Mus musculus OX=10090 GN=Jph2 PE=1 SV=2	RHGLGIETK	69	77	2.09524	0.761905	0.571429	0.571429	0.761905	1.52381						0.190476		0.25974		1.14286	2.47619	2.47619
Junctophilin-2 OS=Mus musculus OX=10090 GN=Jph2 PE=1 SV=2	HGLGIETK	70	77	1.33333	0.767677	0.646465	0.808081	0.808081	0.767677	0.40404	0.282828	0.282828	0.323232	0.40404	0.484848	0.363636		0.484848	0.686869	7.71717	1.65657
Junctophilin-2 OS=Mus musculus OX=10090 GN=Jph2 PE=1 SV=2	GEWTHGFK	84	91	1.11628	1.11628	0.651163	0.930233	0.837209	0.930233	0.55814	0.186047	0.372093	0.27907	0.372093	0.55814	0.465116	0.323232	0.465116	0.837209	1.5814	1.02326
Junctophilin-2 OS=Mus musculus OX=10090 GN=Jph2 PE=1 SV=2	QSVPYGMAVVVR	145	156	1.14286	0.914286	0.666667	0.838095	0.895238	0.857143	0.380952	0.114286	0.133333	0.0952381	0.304762	0.438095	0.152381	0.372093	0.285714	0.838095	1.90476	0.971429
Junctophilin-2 OS=Mus musculus OX=10090 GN=Jph2 PE=1 SV=2	TSLSSLR	161	167	0.981132	0.867925	0.45283	0.641509	0.716981	0.792453	0.339623	0.188679	0.226415	0.113208	0.264151	0.339623	0.0754717	0.114286	0.264151	0.339623	0.339623	0.150943
Junctophilin-2 OS=Mus musculus OX=10090 GN=Jph2 PE=1 SV=2	GGFALTLLATAEAAR	195	209	1.38462	0.692308	0.153846	0.769231	1.07692	1.15385	0.615385				0.307692	0.461538		0.0754717	0.0769231		0.230769	0.230769
Junctophilin-2 OS=Mus musculus OX=10090 GN=Jph2 PE=1 SV=2	GGFALTLLATAEAARPQGLFTR	195	216	1.08642	0.493827	0.296296	1.28395	1.18519	1.48148	0.888889	0.197531		0.0987654	0.395062	0.395062			0.197531	0.296296	0.296296	0.395062
Junctophilin-2 OS=Mus musculus OX=10090 GN=Jph2 PE=1 SV=2	PQGLFTR	210	216	1.06667	1.06667	0.853333	0.96	0.96	0.96	0.853333	0.213333	0.32	0.213333	0.213333	0.746667		0.0987654	0.213333	0.213333	0.32
Junctophilin-2 OS=Mus musculus OX=10090 GN=Jph2 PE=1 SV=2	TSLGSQR	230	236	0.57971	0.695652	0.811594	1.04348	0.695652	0.927536	1.15942	0.57971	0.463768	0.347826		0.115942
Junctophilin-2 OS=Mus musculus OX=10090 GN=Jph2 PE=1 SV=2	SGFGVSER	295	302	1.02256	0.721805	0.601504	1.14286	0.781955	0.842105	0.721805	0.541353	0.661654	0.842105	0.360902	0.421053	0.601504		0.421053	0.360902	0.360902	0.421053
Junctophilin-2 OS=Mus musculus OX=10090 GN=Jph2 PE=1 SV=2	YEGEWLDNLR	308	317	1.17857	1.03571	0.607143	0.714286	0.857143	0.892857	0.678571	0.285714	0.5	0.428571	0.142857	0.285714	0.392857	0.541353	0.214286	0.178571	0.214286	0.25
Junctophilin-2 OS=Mus musculus OX=10090 GN=Jph2 PE=1 SV=2	TTLPDGHREEGK	323	334	0.528926	1.19008	0.528926	0.859504	0.793388	0.92562	0.661157	0.661157	0.92562	0.991736	0.0661157	0.132231	0.727273	0.25	0.132231			0.264463
Junctophilin-2 OS=Mus musculus OX=10090 GN=Jph2 PE=1 SV=2	TTLPDGHR	323	330	1.14286	0.831169	0.623377	1.14286		1.14286	1.14286	0.623377	0.831169			0.311688	0.623377	0.198347	0.103896		0.311688	0.311688
Junctophilin-2 OS=Mus musculus OX=10090 GN=Jph2 PE=1 SV=2	LLQEILENSESLLEPPER	360	369	0.727273	0.363636	0.969697	1.69697	1.09091	1.09091	1.33333	0.727273	0.969697	1.81818	0.363636	0.606061	0.727273	0.727273	0.363636	0.121212	0.121212	0.242424
Junctophilin-2 OS=Mus musculus OX=10090 GN=Jph2 PE=1 SV=2	GLGTGLPERPR	378	384		0.688525	0.688525	1.57377	0.688525	0.983607	1.37705	0.688525	0.786885	1.27869	0.295082	0.393443	0.688525	0.969697	0.491803	0.295082	0.0983607	0.0983607
Junctophilin-2 OS=Mus musculus OX=10090 GN=Jph2 PE=1 SV=2	ESPQLHER	390	410	1.16084	0.895105	0.265734	0.265734	0.27972	0.265734	0.237762	0.125874	0.125874	0.0559441	0.027972	0.0839161	0.041958	0.786885	0.0559441	0.041958	0.0559441	0.0839161
Junctophilin-2 OS=Mus musculus OX=10090 GN=Jph2 PE=1 SV=2	ETPQPEGGPPSPAGTPPQPKRPRPGASK	392	410	1.02607	1.04261	0.387257	0.638808	0.930079	0.777824	0.327679	0.0794373	0.334299	0.383947	0.0397187	0.0463384	0.059578	0.111888	0.0496483	0.0264791	0.0562681	0.102607
Junctophilin-2 OS=Mus musculus OX=10090 GN=Jph2 PE=1 SV=2	ETPQPEGGPPSPAGTPPQPK	415	429	1.07975	0.834356	0.490798	0.736196	0.883436	0.0490798	0.932515	0.245399	0.588957	0.736196	0.147239	0.245399	0.490798	0.0397187	0.147239			0.147239
Junctophilin-2 OS=Mus musculus OX=10090 GN=Jph2 PE=1 SV=2	DGLLSPGSWNGEPGGEGSRPATPSDGAGR	432	449	1.45455	0.727273	0.221344	0.505929	0.664032	0.853755	0.727273	0.411067	0.695652	0.885375			0.284585	0.294479				0.158103
Junctophilin-2 OS=Mus musculus OX=10090 GN=Jph2 PE=1 SV=2	RSPARPASEHMAIEALQPPPAPSQEPEVAMYR	450	460	0.869565	1.21739	0.695652	1.10145	0.521739	0.985507	0.927536	0.347826	0.753623	1.15942				0.379447			0.173913	0.173913
Junctophilin-2 OS=Mus musculus OX=10090 GN=Jph2 PE=1 SV=2	GYHSYAVR	461	468	0.842105	0.947368	0.315789	1.26316	0.736842	1.05263	0.631579	0.421053	0.736842	0.947368							0.210526	0.315789
Junctophilin-2 OS=Mus musculus OX=10090 GN=Jph2 PE=1 SV=2	TGPPEPPPLEDEQEPEPEPEPEVR	469	488	1.11765	0.882353	0.941176	1	0.941176	0.941176	0.823529	0.647059	1.05882	0.941176							0.235294	0.588235
Junctophilin-2 OS=Mus musculus OX=10090 GN=Jph2 PE=1 SV=2	DGLLSPGSWNGEPGGEGSR	497	515	1.07865	1.25843	0.629213	0.449438	0.988764	0.719101	0.719101	0.0898876	0.629213	0.808989
Junctophilin-2 OS=Mus musculus OX=10090 GN=Jph2 PE=1 SV=2	PATPSDGAGR	516	525	1.21519	0.708861	0.607595	1.11392	0.708861	0.911392	1.11392	1.01266	0.607595	1.21519	0.101266	0.202532			0.202532	0.202532	0.303797	0.607595
Junctophilin-2 OS=Mus musculus OX=10090 GN=Jph2 PE=1 SV=2	SPARPASEHMAIEALQPPPAPSQEPEVAMYR	527	557	1.09353	0.748201	0.633094	0.57554	0.748201	0.517986	0.863309	0.230216	0.28777	0.748201								0.115108
Junctophilin-2 OS=Mus musculus OX=10090 GN=Jph2 PE=1 SV=2	PASEHMAIEALQPPPAPSQEPEVAMYR	531	557	1.60479	1.12575	0.383234	0.479042	0.790419	0.598802	0.45509	0.0958084	0.335329	0.57485								0.0479042
Junctophilin-2 OS=Mus musculus OX=10090 GN=Jph2 PE=1 SV=2	TGPPEPPPLEDEQEPEPEPEPEVR	566	589	1.86301	0.219178	0.876712								0.876712	2.19178	0.328767		2.41096	0.438356	0.438356
Junctophilin-2 OS=Mus musculus OX=10090 GN=Jph2 PE=1 SV=2	RSDSAPPSPVSATVPEEEPPAPR	590	612	1.09589	0.876712	0.493151	0.383562	0.273973	0.273973	0.109589	0.273973	0.273973	0.164384	0.712329	1.15068	0.328767		1.09589	0.164384	0.328767	0.109589
Junctophilin-2 OS=Mus musculus OX=10090 GN=Jph2 PE=1 SV=2	SDSAPPSPVSATVPEEEPPAPR	591	612	1.30496	0.907801	0.794326	0.22695	0.170213	0.113475					0.851064	1.02128	0.22695	0.273973	0.907801	0.170213	0.283688
Junctophilin-2 OS=Mus musculus OX=10090 GN=Jph2 PE=1 SV=2	QATLEPK	619	625	1.18919	1.2973	0.972973		0.432432	0.324324					1.08108	1.18919	0.324324	0.0567376	1.18919	0.540541
																	0.324324
Average values, normalized				Fraction
Protein	Peptide	Start	Stop	#6_A	#6_B	#6_F	#5_B	#5_C	#5_F	#4_C	#3_B	#3_C	#3_D	#2_B	#2_C	#2_D	#2_E	#2_F	#1_C	#1_D	#1_E	#6_AB	#5_BCF	#2_BCF	#1_CDE
Junctophilin-2 OS=Mus musculus OX=10090 GN=Jph2 PE=1 SV=2	GPLGSMSGGR	-4	5	1.25984	0.740157	0.614173	0.787402	0.748031	0.826772	0.330709	0.15748	0.149606	0.0944882	0.283465	0.409449	0.283465	0.204724	0.283465	1.2126	2.25984	1.85039	1	0.787402	0.325459	1.77428
Junctophilin-2 OS=Mus musculus OX=10090 GN=Jph2 PE=1 SV=2	FDFDDGGAYCGGWEGGK	6	22	1.15152	0.848485	0.484848	0.49697	0.618182	0.557576	0.254545	0.109091	0.193939	0.157576	0.193939	0.290909	0.30303	0.242424	0.327273	0.787879	1.17576	1.98788	1	0.557576	0.270707	1.31717
Junctophilin-2 OS=Mus musculus OX=10090 GN=Jph2 PE=1 SV=2	AHGHGLCTGPK	23	33	0.662338	1.33766	1.14286	1.23377	1.11688	1.09091	0.688312	0.246753	0.242424	0.194805	0.272727	0.649351	0.558442	0.428571	0.467532	1.38961	1.37662	1.54113	1	1.14719	0.463203	1.42621
Junctophilin-2 OS=Mus musculus OX=10090 GN=Jph2 PE=1 SV=2	RHGLGIETK	69	77	1.42857	0.571429	0.428571	0.52381	0.619048	0.857143						0.190476	0.190476			1.47619	2.04762	2.52381	1	0.666667	0.190476	2.01587
Junctophilin-2 OS=Mus musculus OX=10090 GN=Jph2 PE=1 SV=2	HGLGIETK	70	77	1.11111	0.888889	0.838384	0.747475	0.858586	0.89899	0.434343	0.282828	0.262626	0.292929	0.454545	0.434343	0.383838	0.343434	0.424242	1.33333	3.34343	2.27273	1	0.835017	0.43771	2.3165
Junctophilin-2 OS=Mus musculus OX=10090 GN=Jph2 PE=1 SV=2	GEWTHGFK	84	91	1	1	0.627907	0.72093	0.837209	0.906977	0.488372	0.27907	0.27907	0.302326	0.395349	0.44186	0.465116	0.372093	0.418605	1.13953	1.48837	1.53488	1	0.821705	0.418605	1.3876
Junctophilin-2 OS=Mus musculus OX=10090 GN=Jph2 PE=1 SV=2	QSVPYGMAVVVR	145	156	1.0619	0.938095	0.666667	0.771429	0.933333	0.904762	0.252381	0.109524	0.119048	0.109524	0.247619	0.32381	0.238095	0.12381	0.233333	0.966667	1.24286	1.07619	1	0.869841	0.268254	1.09524
Junctophilin-2 OS=Mus musculus OX=10090 GN=Jph2 PE=1 SV=2	TSLSSLR	161	167	1.11321	0.886792	0.641509	0.613208	0.849057	0.90566	0.292453	0.179245	0.179245	0.103774	0.254717	0.301887	0.245283	0.0849057	0.245283	0.433962	0.283019	0.132075	1	0.789308	0.267296	0.283019
Junctophilin-2 OS=Mus musculus OX=10090 GN=Jph2 PE=1 SV=2	GGFALTLLATAEAAR	195	209	1	1	0.615385	0.788462	1.07692	0.942308	0.480769	0.0769231	0.0769231		0.205128	0.403846	0.128205		0.0769231	0.153846	0.128205	0.153846	1	0.935897	0.230769	0.142857
Junctophilin-2 OS=Mus musculus OX=10090 GN=Jph2 PE=1 SV=2	GGFALTLLATAEAARPQGLFTR	195	216	0.91358	1.08642	0.814815	1.20988	1.38272	1.25926	0.839506	0.296296	0.246914	0.131687	0.296296	0.395062	0.263374	0.0987654	0.197531	0.263374	0.230453	0.329218	1	1.28395	0.296296	0.274348
Junctophilin-2 OS=Mus musculus OX=10090 GN=Jph2 PE=1 SV=2	PQGLFTR	210	216	0.986667	1.01333	0.8	0.853333	0.96	0.933333	0.924444	0.32	0.32	0.248889	0.266667	0.613333	0.186667		0.24	0.16	0.266667		1	0.915556	0.394667	0.213333
Junctophilin-2 OS=Mus musculus OX=10090 GN=Jph2 PE=1 SV=2	TSLGSQR	230	236	1.18841	0.811594	0.724638	0.869565	0.637681	0.753623	1.13043	0.492754	0.463768	0.405797	0.115942	0.154589	0.115942		0.115942				1	0.753623	0.132505
Junctophilin-2 OS=Mus musculus OX=10090 GN=Jph2 PE=1 SV=2	SGFGVSER	295	302	1.02256	0.977444	0.796992	0.857143	0.947368	1.08271	0.661654	0.496241	0.796992	1.2782	0.285714	0.441103	0.451128	0.736842	0.360902	0.360902	0.345865	0.390977	1	0.962406	0.355434	0.365915
Junctophilin-2 OS=Mus musculus OX=10090 GN=Jph2 PE=1 SV=2	YEGEWLDNLR	308	317	0.821429	1.17857	0.633929	0.75	1.13393	1.13393	0.526786	0.303571	0.616071	0.883929	0.116071	0.205357	0.258929	0.401786	0.196429	0.160714	0.196429	0.214286	1	1.00595	0.172619	0.190476
Junctophilin-2 OS=Mus musculus OX=10090 GN=Jph2 PE=1 SV=2	TTLPDGHREEGK	323	334	0.859504	1.1405	0.661157	0.892562	0.677686	0.892562	0.842975	0.561983	0.826446	1.17355	0.0661157	0.14876	0.31405	0.512397	0.165289	0.0661157	0.132231	0.181818	1	0.820937	0.132231	0.141677
Junctophilin-2 OS=Mus musculus OX=10090 GN=Jph2 PE=1 SV=2	TTLPDGHR	323	330	1.06494	0.935065	0.831169	0.935065	1.03896	0.969697	0.805195	0.571429	0.727273	0.865801		0.207792	0.285714	0.701299	0.103896		0.25974	0.207792	1	0.976623	0.187013	0.225108
Junctophilin-2 OS=Mus musculus OX=10090 GN=Jph2 PE=1 SV=2	LLQEILENSESLLEPPER	360	369	0.939394	1.06061	1.09091	1.30303	1.15152	1.30303	1.12121	0.878788	1.12121	1.69697	0.333333	0.424242	0.969697	0.818182	0.30303	0.121212	0.151515	0.212121	1	1.25253	0.353535	0.161616
Junctophilin-2 OS=Mus musculus OX=10090 GN=Jph2 PE=1 SV=2	GLGTGLPERPR	378	384	1.08197	0.959016	1.0082	1.2541	0.762295	1.13115	1.15574	0.811475	1.03279	1.37705	0.368852	0.516393	0.565574	0.811475	0.516393	0.196721	0.0983607	0.122951	1	1.04918	0.467213	0.153005
Junctophilin-2 OS=Mus musculus OX=10090 GN=Jph2 PE=1 SV=2	ESPQLHER	390	410	1.22378	0.776224	0.20979	0.426573	0.479021	0.332168	0.143357	0.111888	0.181818	0.20979	0.0314685	0.0559441	0.0699301	0.0909091	0.041958	0.0652681	0.0559441	0.0792541	1	0.412587	0.0431235	0.0668221
Junctophilin-2 OS=Mus musculus OX=10090 GN=Jph2 PE=1 SV=2	ETPQPEGGPPSPAGTPPQPKRPRPGASK	392	410	1.03434	0.96566	0.487381	0.731485	0.934216	0.932561	0.21597	0.0827472	0.297062	0.693422	0.029789	0.0388912	0.0496483	0.0695077	0.0355813	0.0239967	0.0452351	0.0670252	1	0.866087	0.0347538	0.0454357
Junctophilin-2 OS=Mus musculus OX=10090 GN=Jph2 PE=1 SV=2	ETPQPEGGPPSPAGTPPQPK	415	429	1.0184	0.981595	0.539877	0.736196	0.895706	0.748466	0.576687	0.306748	0.588957	0.797546	0.0981595	0.208589	0.269939	0.441718	0.171779	0.0490798	0.0490798	0.122699	1	0.793456	0.165086	0.0858896
Junctophilin-2 OS=Mus musculus OX=10090 GN=Jph2 PE=1 SV=2	DGLLSPGSWNGEPGGEGSRPATPSDGAGR	432	449	1.06719	0.932806	0.758893	0.687747	0.87747	0.782609	0.656126	0.284585	0.513834	0.885375		0.0316206	0.0948617	0.332016				0.0948617	1	0.782609	0.0316206	0.0948617
Junctophilin-2 OS=Mus musculus OX=10090 GN=Jph2 PE=1 SV=2	RSPARPASEHMAIEALQPPPAPSQEPEVAMYR	450	460	0.84058	1.15942	0.768116	0.971014	0.913043	1.28986	0.768116	0.507246	0.913043	1.37681				0.057971			0.135266	0.188406	1	1.05797		0.165631
Junctophilin-2 OS=Mus musculus OX=10090 GN=Jph2 PE=1 SV=2	GYHSYAVR	461	468	1.02632	0.973684	0.631579	0.947368	0.77193	0.947368	0.657895	0.684211	0.868421	1.05263							0.157895	0.342105	1	0.899522		0.25
Junctophilin-2 OS=Mus musculus OX=10090 GN=Jph2 PE=1 SV=2	TGPPEPPPLEDEQEPEPEPEPEVR	469	488	1.02941	0.970588	0.852941	0.985294	0.926471	1.16176	0.882353	0.691176	0.970588	0.941176							0.117647	0.544118	1	1.02451		0.330882
Junctophilin-2 OS=Mus musculus OX=10090 GN=Jph2 PE=1 SV=2	DGLLSPGSWNGEPGGEGSR	497	515	0.966292	1.03371	0.696629	0.696629	0.966292	0.696629	0.629213	0.292135	0.58427	0.853933								0.0898876	1	0.786517		0.0898876
Junctophilin-2 OS=Mus musculus OX=10090 GN=Jph2 PE=1 SV=2	PATPSDGAGR	516	525	1.01266	0.987342	0.810127	0.911392	0.810127	1.08861	1.03797	0.708861	0.658228	1.21519	0.101266	0.135021	0.151899		0.135021	0.177215	0.278481	0.531646	1	0.936709	0.126582	0.329114
Junctophilin-2 OS=Mus musculus OX=10090 GN=Jph2 PE=1 SV=2	SPARPASEHMAIEALQPPPAPSQEPEVAMYR	527	557	1.02158	0.978417	0.460432	0.589928	0.791367	0.690647	0.47482	0.172662	0.359712	0.705036								0.143885	1	0.690647		0.143885
Junctophilin-2 OS=Mus musculus OX=10090 GN=Jph2 PE=1 SV=2	PASEHMAIEALQPPPAPSQEPEVAMYR	531	557	1.11377	0.886228	0.526946	0.45509	0.742515	0.646707	0.335329	0.107784	0.293413	0.562874							0.0239521	0.0778443	1	0.61477		0.0670659
Junctophilin-2 OS=Mus musculus OX=10090 GN=Jph2 PE=1 SV=2	TGPPEPPPLEDEQEPEPEPEPEVR	566	589	1.0411	0.958904	0.876712							0.219178	1.23288	2	1.15068	0.328767	2.32877	0.383562	0.328767	0.109589	1		1.85388	0.273973
Junctophilin-2 OS=Mus musculus OX=10090 GN=Jph2 PE=1 SV=2	RSDSAPPSPVSATVPEEEPPAPR	590	612	1.17808	0.821918	0.616438	0.342466	0.273973	0.260274	0.0821918	0.219178	0.219178	0.136986	0.671233	0.945205	0.56621	0.30137	1	0.246575	0.237443	0.191781	1	0.293898	0.872146	0.224159
Junctophilin-2 OS=Mus musculus OX=10090 GN=Jph2 PE=1 SV=2	SDSAPPSPVSATVPEEEPPAPR	591	612	1.07801	0.921986	0.808511	0.255319	0.170213	0.12766					0.780142	0.978723	0.737589	0.141844	0.865248	0.141844	0.255319		1	0.184397	0.874704	0.179669
Junctophilin-2 OS=Mus musculus OX=10090 GN=Jph2 PE=1 SV=2	QATLEPK	619	625	1	1	1	0.432432	0.27027	0.27027			0.162162		0.972973	1.02703	0.945946	0.324324	1.08108	0.432432			1	0.314496	1.02703	0.432432
